# Supplementary material for: Heterologous expression of a single fungal HR-PKS leads to the formation of diverse 2-alkenyl-tetrahydropyrans in model fungi
Source: Royal Society of Chemistry journal article supplement (doi:10.1039/d1ob01501j), 2021-01-01
Supplement: d1ob01501j1.pdf [file d1ob01501j1.pdf]

## Supporting Information

### Heterologous expression of a single HR-PKS leads to the formation of diverse 2-alkenyl-tetrahydropyrans in model fungi

Hai-Ning Lyu <sup>a, b‡</sup>, Jinyu Zhang <sup>a, c‡</sup>, Shuang Zhou <sup>a</sup>, Hong-Wei Liu <sup>a</sup>, Wen-Ying Zhuang <sup>a</sup>, Shu-Ming Li <sup>d</sup>, Wen-Bing Yin <sup>a,c,\*</sup>

<sup>a</sup> *State Key Laboratory of Mycology, Institute of Microbiology, Chinese Academy of Sciences, Beijing 100101, People's Republic of China*

<sup>b</sup> *Artemisinin Research Center, Institute of Chinese Materia Medica, China Academy of Chinese Medical Sciences, Beijing 100700, People's Republic of China*

<sup>c</sup> *Savaid Medical School, University of Chinese Academy of Sciences, Beijing 100049, People's Republic of China*

<sup>d</sup> *Institut für Pharmazeutische Biologie und Biotechnologie, Philipps-Universität Marburg, Marburg 35037, Germany*

\*Corresponding authors:

Wen-Bing Yin,  
E-mail: [yinwb@im.ac.cn](mailto:yinwb@im.ac.cn).  
Tel: 86-10-64806170.

‡ These authors contributed equally to this work.

# Content

## 1. Supplementary tables

**Table S1.** Fungal strains and plasmids used in this study

**Table S2.** PCR primers used in this study

**Table S3.** HR-ESI-MS data for isolated compounds

## 2. Supplementary figures

**Figure S1.** The *app* biosynthetic gene cluster and its homologues in *Trichoderma* (A), and gene function predictions (B)

**Figure S2.** Transformant verification of App1 in *A. nidulans* by diagnostic PCR

**Figure S3.** <sup>1</sup>H NMR spectrum of **1** in CDCl<sub>3</sub> (500MHz)

**Figure S4.** <sup>13</sup>C NMR spectrum of **1** in CDCl<sub>3</sub> (125MHz)

**Figure S5.** <sup>1</sup>H-<sup>1</sup>H COSY spectrum of **1** in CDCl<sub>3</sub>

**Figure S6.** HSQC spectrum of **1** in CDCl<sub>3</sub>

**Figure S7.** HMBC spectrum of **1** in CDCl<sub>3</sub>

**Figure S8.** <sup>1</sup>H NMR spectrum of **2** in CDCl<sub>3</sub> (500MHz)

**Figure S9.** <sup>13</sup>C NMR spectrum of **2** in CDCl<sub>3</sub> (125MHz)

**Figure S10.** <sup>1</sup>H-<sup>1</sup>H COSY spectrum of **2** in CDCl<sub>3</sub>

**Figure S11.** HSQC spectrum of **2** in CDCl<sub>3</sub>

**Figure S12.** HMBC spectrum of **2** in CDCl<sub>3</sub>

**Figure S13.** <sup>1</sup>H NMR spectrum of **3** in CDCl<sub>3</sub> (500MHz)

**Figure S14.** <sup>13</sup>C NMR spectrum of **3** in CDCl<sub>3</sub> (125MHz)

**Figure S15.** <sup>1</sup>H-<sup>1</sup>H COSY spectrum of **3** in CDCl<sub>3</sub>

**Figure S16.** HSQC spectrum of **3** in CDCl<sub>3</sub>

**Figure S17.** HMBC spectrum of **3** in CDCl<sub>3</sub>

**Figure S18.** <sup>1</sup>H NMR spectrum of **4** in CDCl<sub>3</sub> (500MHz)

**Figure S19.** <sup>13</sup>C NMR spectrum of **4** in CDCl<sub>3</sub> (125MHz)

**Figure S20.** <sup>1</sup>H-<sup>1</sup>H COSY spectrum of **4** in CDCl<sub>3</sub>

**Figure S21.** HSQC spectrum of **4** in CDCl<sub>3</sub>

**Figure S22.** HMBC spectrum of **4** in CDCl<sub>3</sub>

**Figure S23.** ROESY of **4** in CDCl<sub>3</sub> (500MHz)

**Figure S24.** <sup>1</sup>H NMR spectrum of **5** in CDCl<sub>3</sub> (500MHz)

**Figure S25.** <sup>13</sup>C NMR spectrum of **5** in CDCl<sub>3</sub> (125MHz)

**Figure S26.** <sup>1</sup>H-<sup>1</sup>H COSY spectrum of **5** in CDCl<sub>3</sub>

**Figure S27.** HSQC spectrum of **5** in CDCl<sub>3</sub>

**Figure S28.** HMBC spectrum of **5** in CDCl<sub>3</sub>

**Figure S29.** <sup>1</sup>H NMR spectrum of **6** in CDCl<sub>3</sub> (500MHz)

**Figure S30.** <sup>13</sup>C NMR spectrum of **6** in CDCl<sub>3</sub> (125MHz)

**Figure S31.** <sup>1</sup>H-<sup>1</sup>H COSY spectrum of **6** in CDCl<sub>3</sub>

**Figure S32.** HSQC spectrum of **6** in CDCl<sub>3</sub>

**Figure S33.** HMBC spectrum of **6** in CDCl<sub>3</sub>

**Figure S34.** <sup>1</sup>H NMR spectrum of **7** in CDCl<sub>3</sub> (500MHz)

**Figure S35.** <sup>13</sup>C NMR spectrum of **7** in CDCl<sub>3</sub> (125MHz)

**Figure S36.** <sup>1</sup>H-<sup>1</sup>H COSY spectrum of **7** in CDCl<sub>3</sub>

**Figure S37.** HSQC spectrum of **7** in CDCl<sub>3</sub>

**Figure S38.** HMBC spectrum of **7** in CDCl<sub>3</sub>

**Figure S39.** <sup>1</sup>H NMR spectrum of **8** in CDCl<sub>3</sub> (500MHz)

**Figure S40.** <sup>13</sup>C NMR spectrum of **8** in CDCl<sub>3</sub> (125MHz)

**Figure S41.** HSQC spectrum of **8** in CDCl<sub>3</sub>

**Figure S42.** HMBC spectrum of **8** in CDCl<sub>3</sub>

**Figure S43.** <sup>1</sup>H NMR spectrum of **9** in CDCl<sub>3</sub> (500MHz)

**Figure S44.** <sup>13</sup>C NMR spectrum of **9** in CDCl<sub>3</sub> (125MHz)

**Figure S45.** <sup>1</sup>H-<sup>1</sup>H COSY spectrum of **9** in CDCl<sub>3</sub>

**Figure S46.** HSQC spectrum of **9** in CDCl<sub>3</sub>

**Figure S47.** HMBC spectrum of **9** in CDCl<sub>3</sub>

**Figure S48.** ROESY of **9** in CDCl<sub>3</sub> (500MHz)

### **3. Supplementary nucleotide sequence data**

### **4. References**

## 1. Supplementary tables

**Table S1.** Fungal strains and plasmids used in this study

| Strain/plasmid                              | Description                                                                                                                                                                                                                                                                                                                                                                                                    | Reference    |
|---------------------------------------------|----------------------------------------------------------------------------------------------------------------------------------------------------------------------------------------------------------------------------------------------------------------------------------------------------------------------------------------------------------------------------------------------------------------|--------------|
| <i>Aspergillus nidulans</i> LO8030          | <i>pyroA4, riboB2, pyrG89, nkuA::argB, sterigmatocystin cluster (AN7804-AN7825)Δ, emericellamide cluster (AN2545-AN2549)Δ, asperfuranone cluster (AN1039-AN1029)Δ, monodictyphenone cluster (AN10023-AN10021) Δ, terrequinone cluster (AN8512-8520)Δ, austinol cluster part 1 (AN8379-AN8384)Δ, austinol cluster part 2 (AN9246-9259)Δ, F9775 cluster (AN7906-7915)Δ, asperthecin cluster (AN6000-AN6002)Δ</i> | <sup>1</sup> |
| TYZS7                                       | pYZS4 in <i>A. nidulans</i> LO8030                                                                                                                                                                                                                                                                                                                                                                             | This study   |
| <i>Saccharomyces cerevisiae</i> BJ5464-NpgA | <i>MATα ura3-52 his3-Δ200 leu2-Δ1 trp1 pep4::HIS3 prb1 Δ1.6R can1 GAL</i>                                                                                                                                                                                                                                                                                                                                      | <sup>2</sup> |
| pXW55                                       | <i>2μ, URA3, ADH2p::ACPC, Amp</i>                                                                                                                                                                                                                                                                                                                                                                              | <sup>3</sup> |
| pRGAMA1                                     | <i>pyrG, AMA1</i>                                                                                                                                                                                                                                                                                                                                                                                              | <sup>4</sup> |
| pYZS4                                       | <i>AMA1::T7792_04478::pyr4</i>                                                                                                                                                                                                                                                                                                                                                                                 | This study   |
| pYLV2                                       | <i>URA3::ADH2p::T7792_04478 ORF</i>                                                                                                                                                                                                                                                                                                                                                                            | This study   |

TXX = original transformant

pXX = plasmid

**Table S2. PCR primers used in this study**

| Name                         | Oligonucleotide sequence (5'-3')                           | Use                   |
|------------------------------|------------------------------------------------------------|-----------------------|
| XmaI-7792-C40 for pRG-AMAI-F | ccccccgggcaagccgtgtgtaagaagtgg                             | Construction of pYZS4 |
| NotI-7792-C40 for pRG-AMAI-R | gaatgcggccgcctcctgacattatgcattcggc                         |                       |
| detect F                     | ctgcatgaagagtgaccgc                                        | Confirmation of TYZS7 |
| detect R                     | gactcgaggataacgtgtccg                                      |                       |
| 4478_1 F                     | ggctagcggattataaggatgatgatgataagactagtagtgcactcttgagcctgc  | Construction of pYLV2 |
| 4478_1 R                     | ggtatcttgctcgtgatgagctcc                                   |                       |
| 4478_2 F                     | gtcagagaatgctgactctcaacc                                   |                       |
| 4478_2 R                     | gtgagtgaattcggacctcctc                                     |                       |
| 4478_3 F                     | cgatgcctgctccaagca                                         |                       |
| 4478_3 R                     | ccggtagcagccatgatatcc                                      |                       |
| 4478_4 F                     | ccatcctgatccactctggc                                       |                       |
| 4478_4 R                     | gtcatttaaattagtgatggatggatggatgcacgtggctagcccagctggcaacaag |                       |

**Table S3.** HR-ESI-MS data for isolated compounds

| Compound | Formula                                        | Calculated | Ion                | Observed |
|----------|------------------------------------------------|------------|--------------------|----------|
| <b>1</b> | C <sub>18</sub> H <sub>30</sub> O <sub>4</sub> | 311.2222   | [M+H] <sup>+</sup> | 311.2225 |
| <b>2</b> | C <sub>18</sub> H <sub>30</sub> O <sub>5</sub> | 327.2171   | [M+H] <sup>+</sup> | 327.2170 |
| <b>3</b> | C <sub>18</sub> H <sub>30</sub> O <sub>5</sub> | 327.2171   | [M+H] <sup>+</sup> | 327.2169 |
| <b>4</b> | C <sub>16</sub> H <sub>26</sub> O <sub>5</sub> | 299.1858   | [M+H] <sup>+</sup> | 299.1856 |
| <b>5</b> | C <sub>20</sub> H <sub>34</sub> O <sub>4</sub> | 339.2535   | [M+H] <sup>+</sup> | 339.2533 |
| <b>6</b> | C <sub>20</sub> H <sub>34</sub> O <sub>4</sub> | 339.2535   | [M+H] <sup>+</sup> | 339.2532 |
| <b>7</b> | C <sub>18</sub> H <sub>28</sub> O <sub>5</sub> | 325.2015   | [M+H] <sup>+</sup> | 325.2017 |
| <b>8</b> | C <sub>18</sub> H <sub>30</sub> O <sub>3</sub> | 295.2273   | [M+H] <sup>+</sup> | 295.2269 |
| <b>9</b> | C <sub>18</sub> H <sub>30</sub> O <sub>3</sub> | 295.2273   | [M+H] <sup>+</sup> | 295.2276 |

## 2. Supplementary figures

A

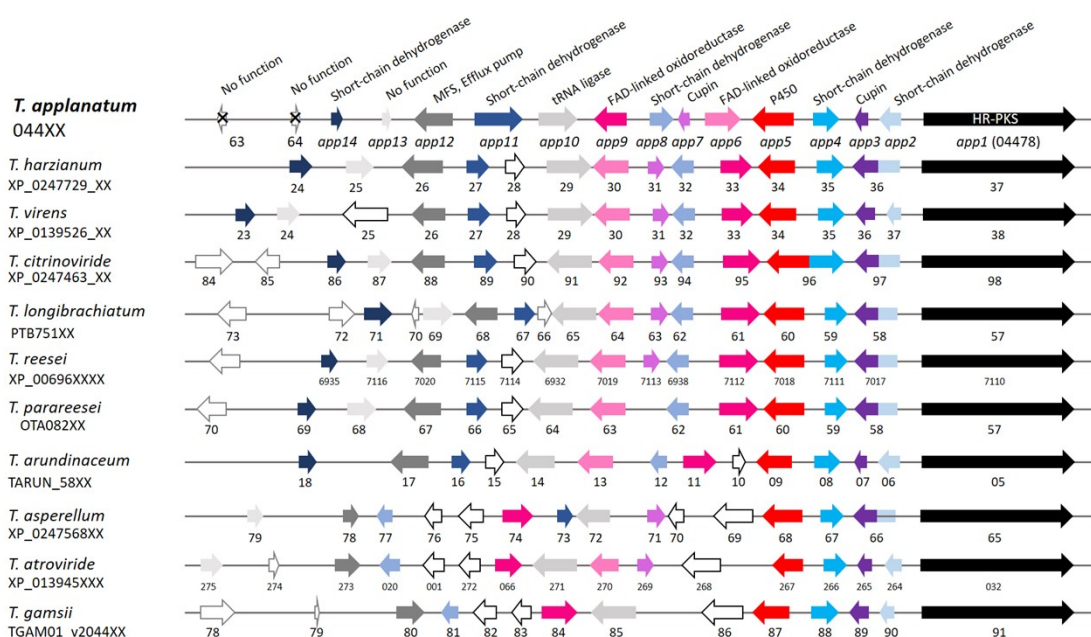

B

| <i>T. applanatum</i> | <i>T. harzianum</i>   | <i>T. virens</i>      | <i>T. citrinoviride</i> | <i>T. longibrachiatum</i> | <i>T. reesei</i>      | <i>T. parareesei</i> | <i>T. arundinaceum</i> | <i>T. asperellum</i>  | <i>T. atroviride</i>  | <i>T. gamsii</i>         | Probable function         |
|----------------------|-----------------------|-----------------------|-------------------------|---------------------------|-----------------------|----------------------|------------------------|-----------------------|-----------------------|--------------------------|---------------------------|
| App14 (04465)        | XP_024772924<br>98/89 | XP_013952623<br>98/90 | XP_024746386<br>99/84   | PTB75171<br>98/84         | XP_006966935<br>86/82 | OTA08269<br>99/82    | TARUN_5818<br>98/92    | -                     | -                     | -                        | Short-chain dehydrogenase |
| App13 (04466)        | XP_024772925<br>99/89 | XP_013952624<br>99/86 | XP_024746387<br>99/86   | PTB75169<br>99/76         | XP_006967116<br>99/76 | OTA08268<br>99/76    | -                      | XP_024756879<br>99/86 | XP_013945275<br>99/82 | -                        | No function               |
| App12 (04467)        | XP_024772926<br>80/83 | XP_013952626<br>80/90 | XP_024746388<br>84/88   | PTB75168<br>80/88         | XP_006967020<br>84/88 | OTA08267<br>99/81    | TARUN_5817<br>99/83    | XP_024756878<br>79/57 | XP_013945273<br>79/61 | TGAM01_v2044<br>80 83/59 | MFS, Efflux pump          |
| App11 (04468)        | XP_024772927<br>55/81 | XP_013952627<br>55/84 | XP_024746389<br>55/75   | PTB75167<br>55/72         | XP_006967115<br>55/76 | OTA08266<br>49/77    | TARUN_5816<br>49/80    | XP_024756873<br>42/75 | -                     | -                        | Short-chain dehydrogenase |
| App10 (04469)        | XP_024772929<br>99/92 | XP_013952629<br>99/89 | XP_024746391<br>99/90   | PTB75165<br>99/90         | XP_006966932<br>99/90 | OTA08264<br>99/90    | TARUN_5814<br>99/93    | XP_024756872<br>99/91 | XP_013945271<br>99/91 | TGAM01_v2044<br>85 99/91 | tRNA ligase               |
| App9 (04470)         | XP_024772933<br>99/77 | XP_013952633<br>90/83 | XP_024746395<br>99/80   | PTB75161<br>99/80         | XP_006967112<br>99/80 | OTA08261<br>99/79    | TARUN_5811<br>99/82    | XP_024756874<br>99/59 | XP_013945066<br>99/59 | TGAM01_v2044<br>84 99/60 | FAD-linked oxidoreductase |
| App8 (04471)         | XP_024772932<br>99/74 | XP_013952632<br>99/75 | XP_024746394<br>95/76   | PTB75162<br>99/76         | XP_006966938<br>94/76 | OTA08262<br>99/76    | TARUN_5812<br>99/82    | XP_024756877<br>98/58 | XP_013945020<br>99/57 | TGAM01_v2044<br>81 99/56 | Short-chain dehydrogenase |
| App7 (04472)         | XP_024772931<br>98/75 | XP_013952631<br>98/76 | XP_024746393<br>98/74   | PTB75163<br>98/73         | XP_006967113<br>98/77 | -                    | -                      | XP_024756871<br>98/75 | XP_013945269<br>98/75 | -                        | Cupin                     |
| App6 (04473)         | XP_024772930<br>96/80 | XP_013952630<br>99/83 | XP_024746392<br>99/79   | PTB75164<br>96/84         | XP_006967019<br>99/83 | OTA08263<br>95/83    | TARUN_5813<br>99/83    | -                     | XP_013945270<br>98/72 | -                        | FAD-linked oxidoreductase |
| App5 (04474)         | XP_024772934<br>98/79 | XP_013952634<br>98/78 | XP_024746396<br>97/77   | PTB75160<br>97/77         | XP_006967018<br>97/79 | OTA08260<br>89/87    | TARUN_5809<br>89/83    | XP_024756868<br>88/76 | XP_013945267<br>88/74 | TGAM01_v2044<br>87 99/72 | P450                      |
| App4 (04475)         | XP_024772935<br>99/79 | XP_013952635<br>99/79 | -                       | PTB75159<br>99/77         | XP_006967111<br>99/77 | OTA08259<br>99/77    | TARUN_5808<br>80/78    | XP_024756867<br>98/80 | XP_013945266<br>99/80 | TGAM01_v2044<br>88 99/80 | Short-chain dehydrogenase |
| App3 (04476)         | XP_024772936<br>91/94 | XP_013952636<br>93/94 | XP_024746397<br>85/96   | PTB75158<br>85/97         | XP_006967017<br>85/98 | OTA08258<br>85/98    | TARUN_5807<br>99/95    | XP_024756866<br>94/89 | XP_013945265<br>93/88 | TGAM01_v2044<br>89 99/82 | Cupin                     |
| App2 (04477)         | XP_024772937<br>99/74 | XP_013952637<br>99/74 | XP_024746398<br>99/83   | PTB75157<br>92/97         | XP_006967016<br>92/76 | OTA08257<br>92/76    | TARUN_5806<br>99/81    | 55/77                 | XP_013945264<br>99/71 | TGAM01_v2044<br>90 99/77 | Short-chain dehydrogenase |
| App1 (04478)         | XP_024772937<br>97/89 | XP_013952638<br>97/90 | XP_024746398<br>99/87   | PTB75157<br>99/86         | XP_006967110<br>99/86 | OTA08257<br>99/86    | TARUN_5805<br>99/90    | XP_024756865<br>98/86 | XP_013945032<br>98/86 | TGAM01_v2044<br>91 99/86 | HRPKS                     |

**Figure S1.** The *app* biosynthetic gene cluster and its homologues in *Trichoderma* (A), and gene function predictions (B)

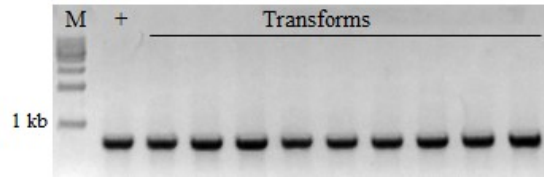

**Figure S2.** Transformant verification of App1 in *A. nidulans* by diagnostic PCR



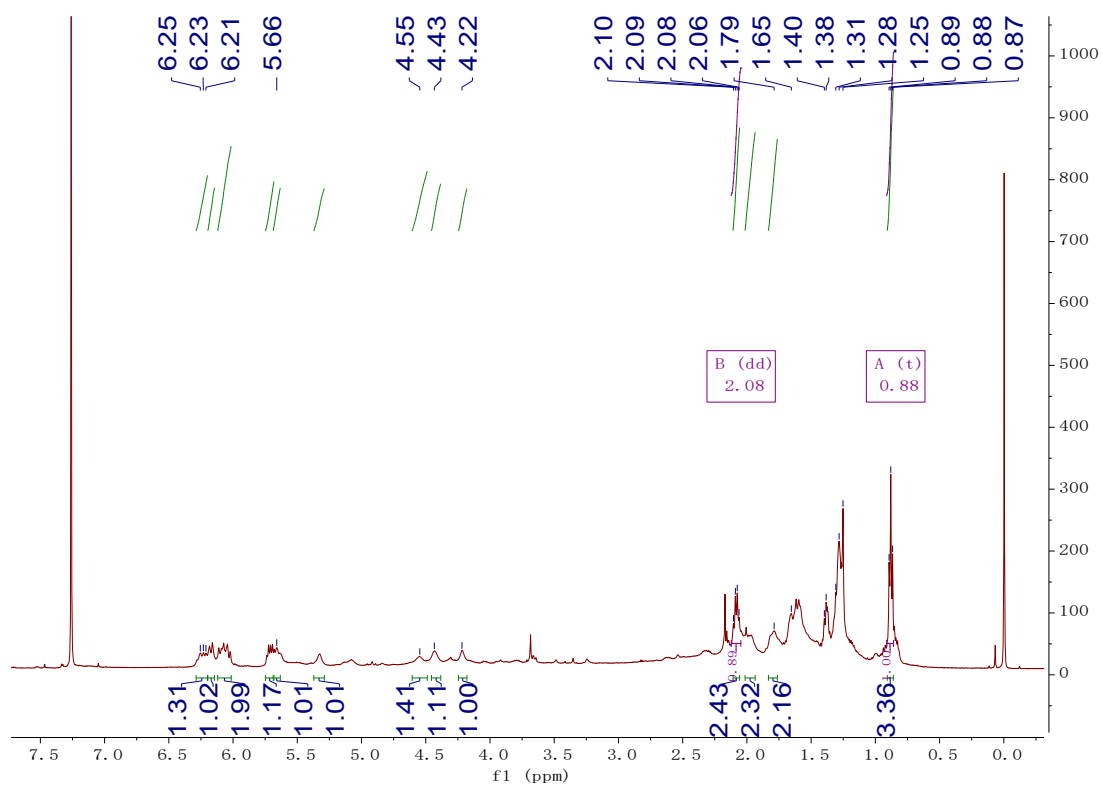

**Figure S3.** <sup>1</sup>H NMR spectrum of **1** in CDCl<sub>3</sub> (500MHz)

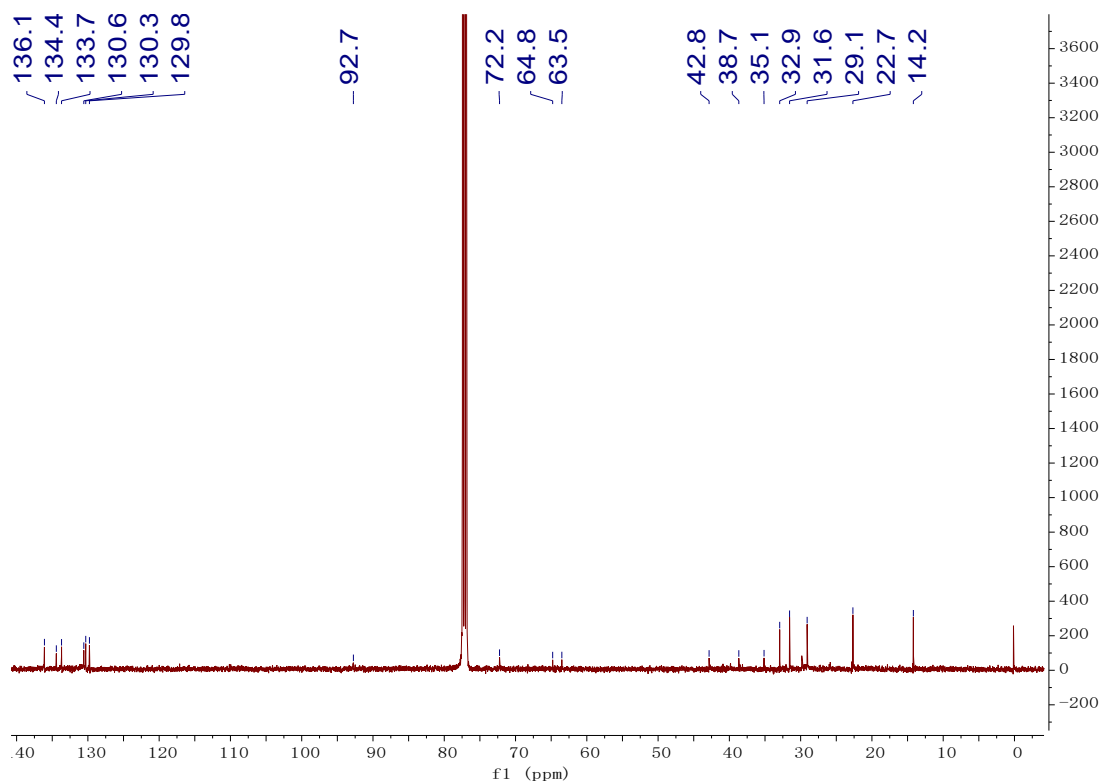

**Figure S4.** <sup>13</sup>C NMR spectrum of **1** in CDCl<sub>3</sub> (125MHz)

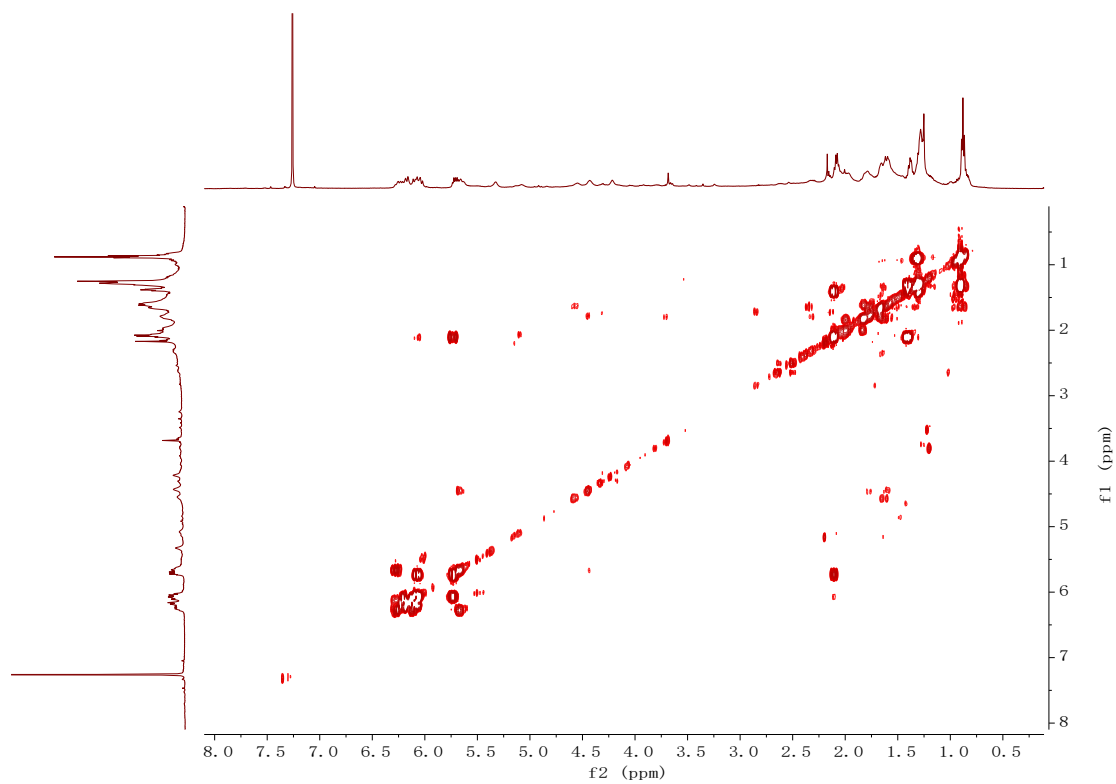

**Figure S5.**  $^1\text{H}$ - $^1\text{H}$  COSY spectrum of **1** in  $\text{CDCl}_3$

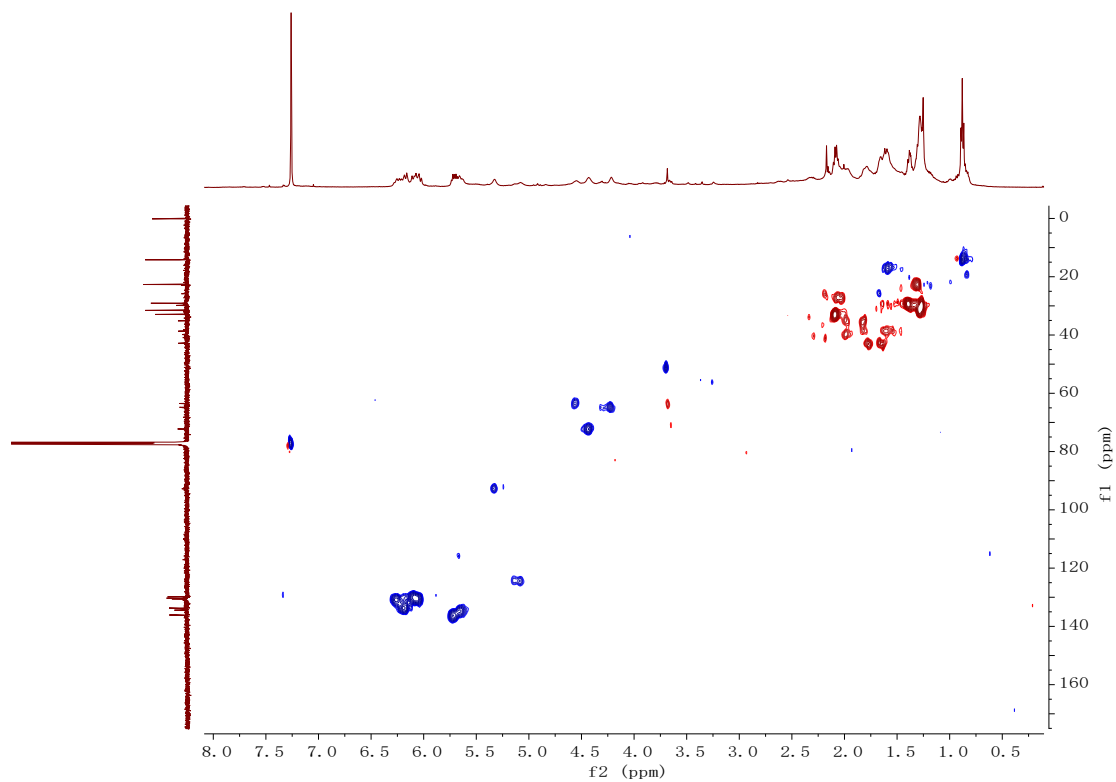

**Figure S6.** HSQC spectrum of **1** in  $\text{CDCl}_3$

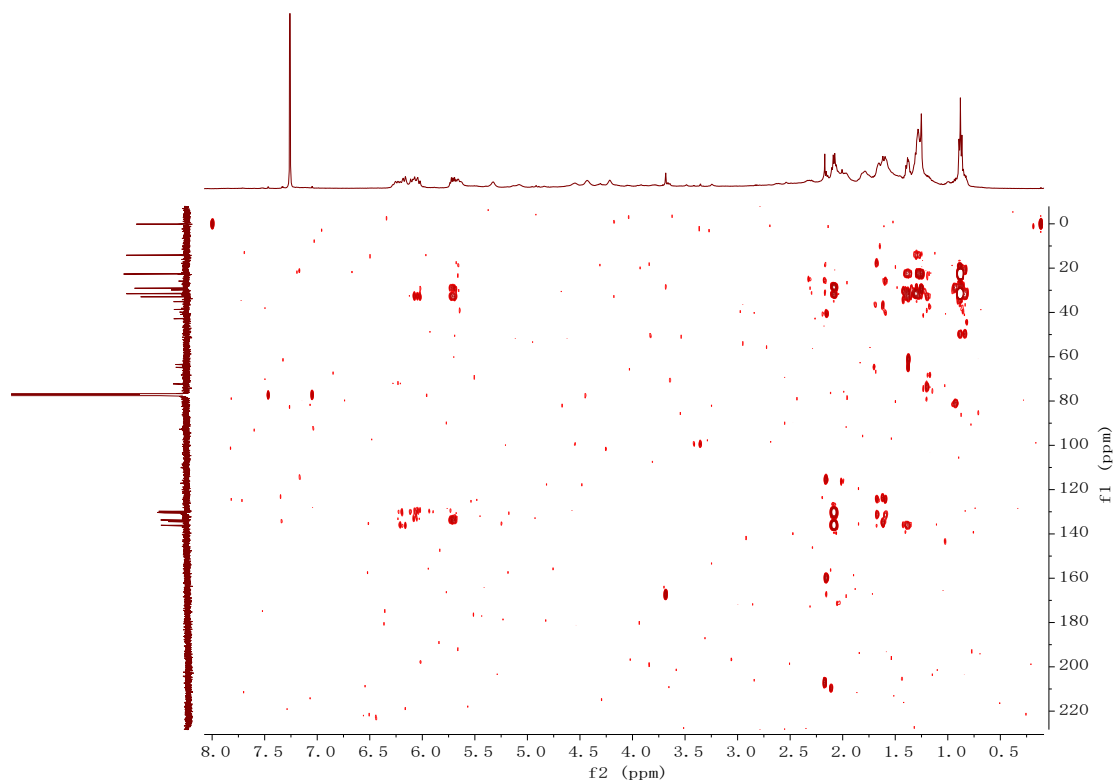

**Figure S7.** HMBC spectrum of **1** in  $\text{CDCl}_3$

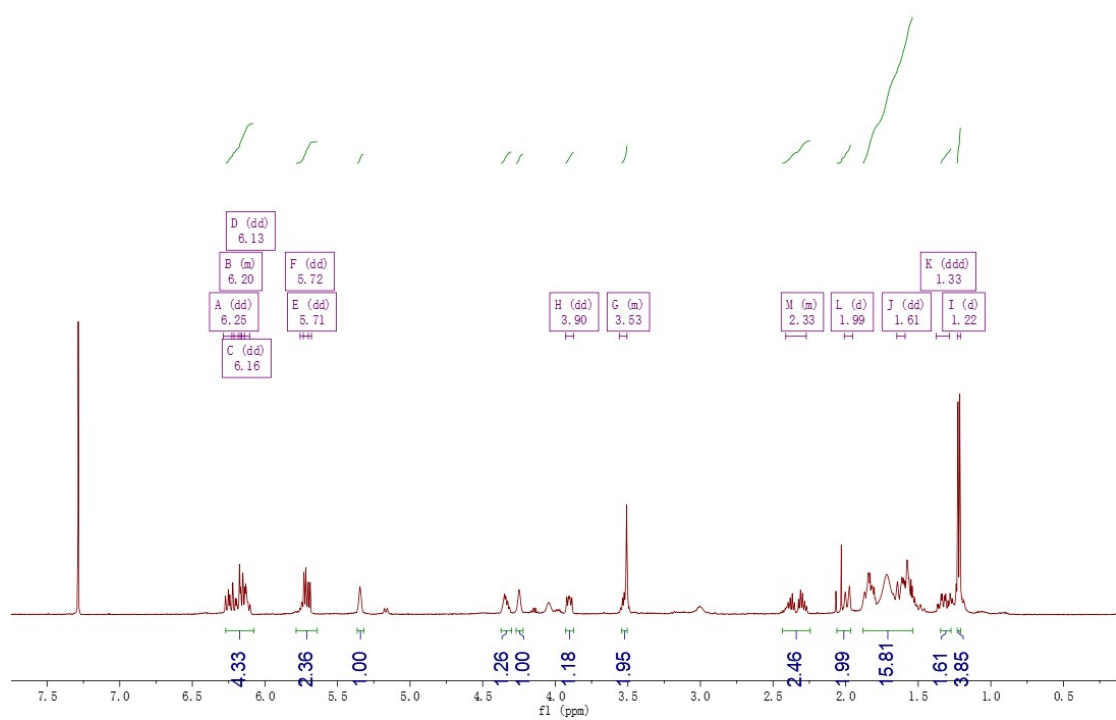

**Figure S8.**  $^1\text{H}$  NMR spectrum of **2** in  $\text{CDCl}_3$  (500MHz)

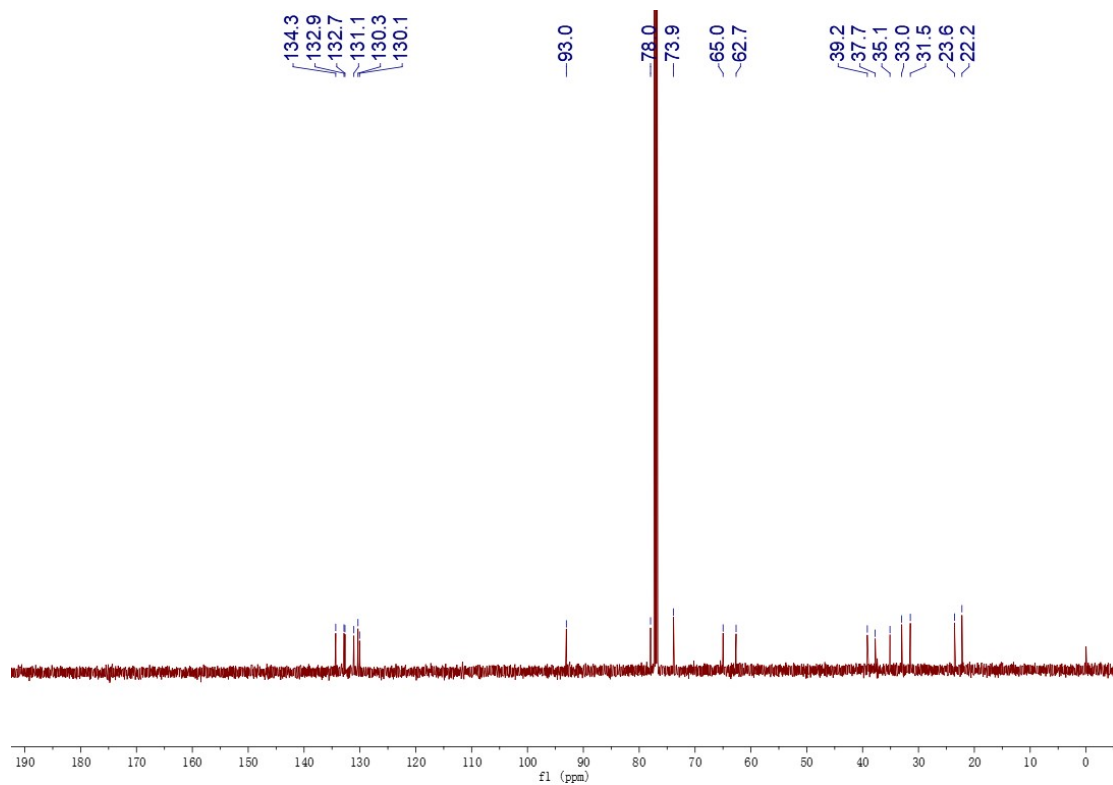

**Figure S9.**  $^{13}\text{C}$  NMR spectrum of **2** in  $\text{CDCl}_3$  (125MHz)

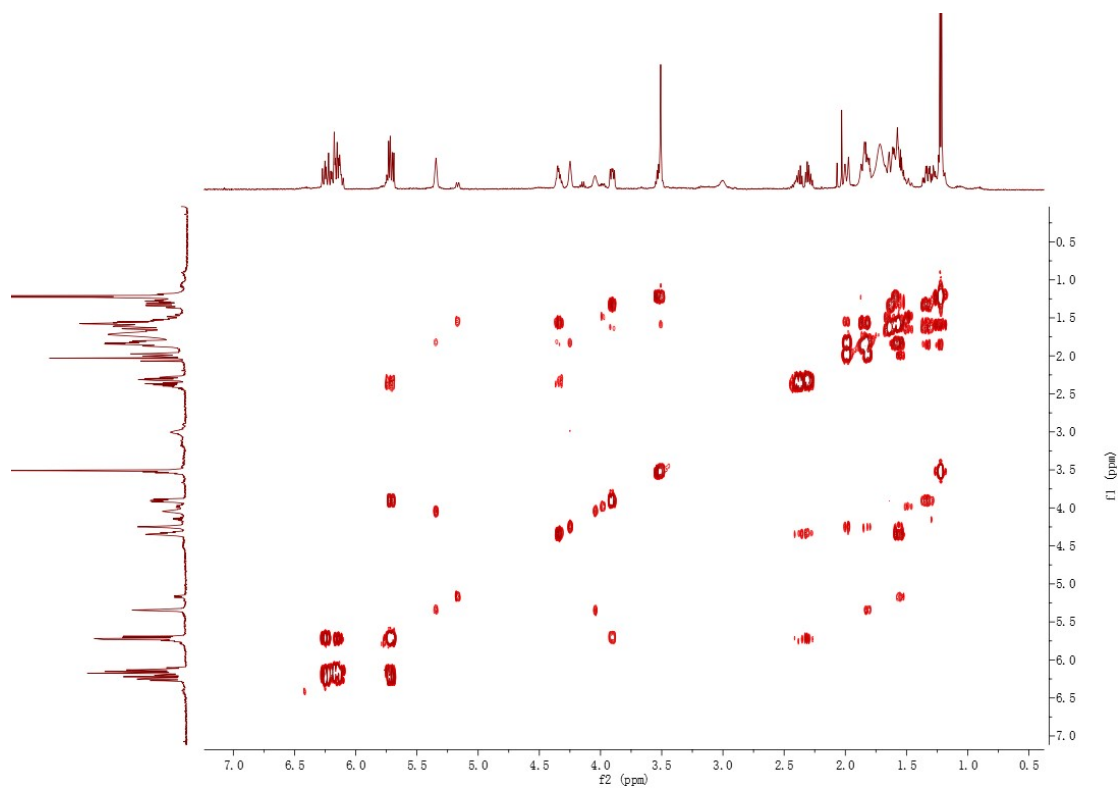

**Figure S10.**  $^1\text{H}$ - $^1\text{H}$  COSY spectrum of **2** in  $\text{CDCl}_3$

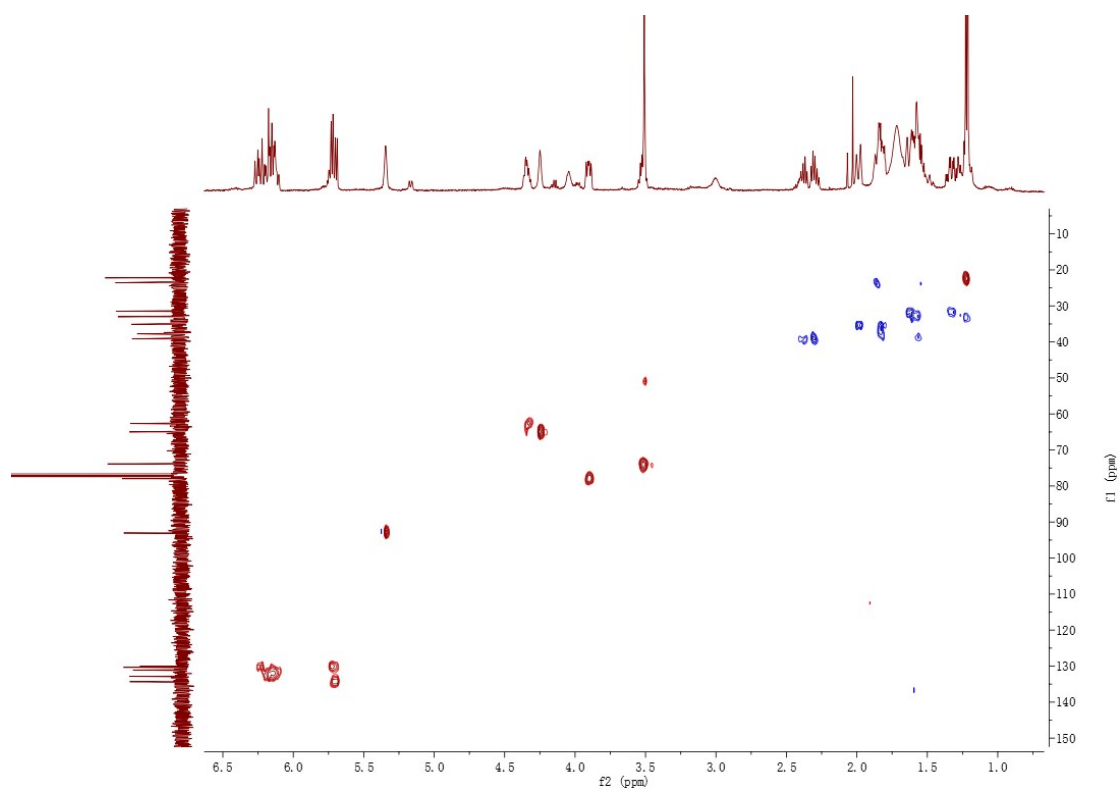

**Figure S11.** HSQC spectrum of **2** in  $\text{CDCl}_3$

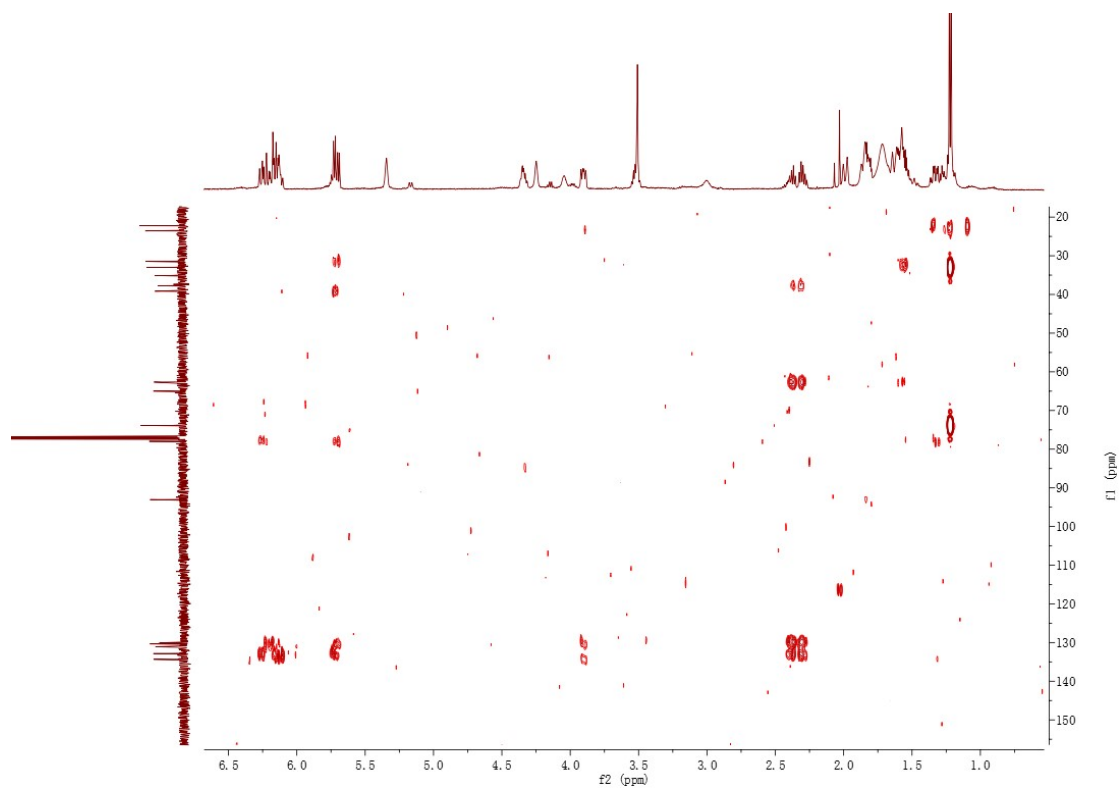

**Figure S12.** HMBC spectrum of **2** in  $\text{CDCl}_3$

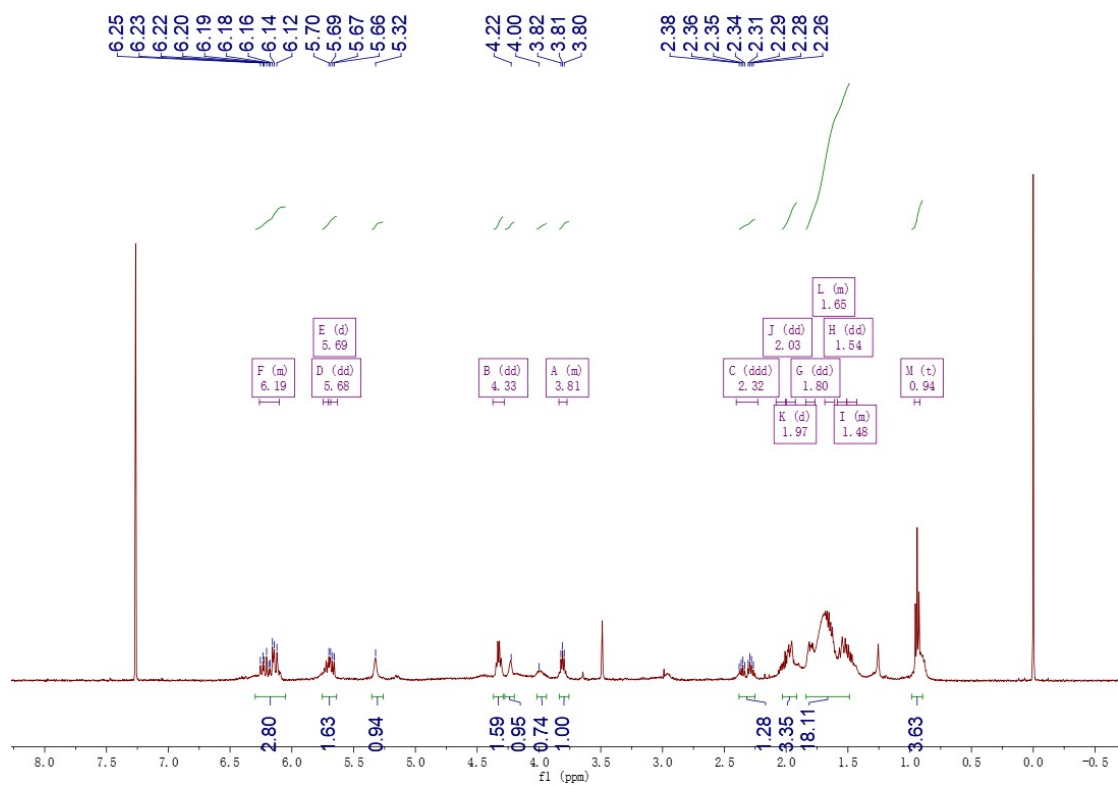

Figure S13.  $^1\text{H}$  NMR spectrum of **3** in  $\text{CDCl}_3$  (500MHz)

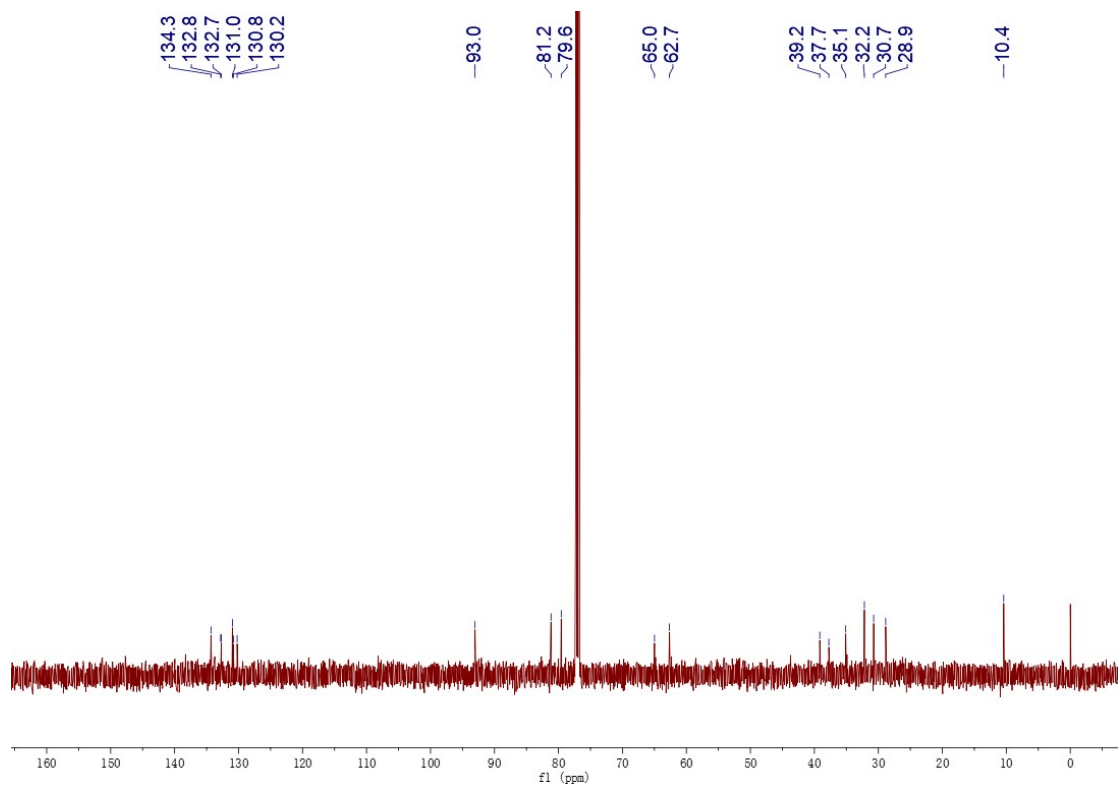

Figure S14.  $^{13}\text{C}$  NMR spectrum of **3** in  $\text{CDCl}_3$  (125MHz)

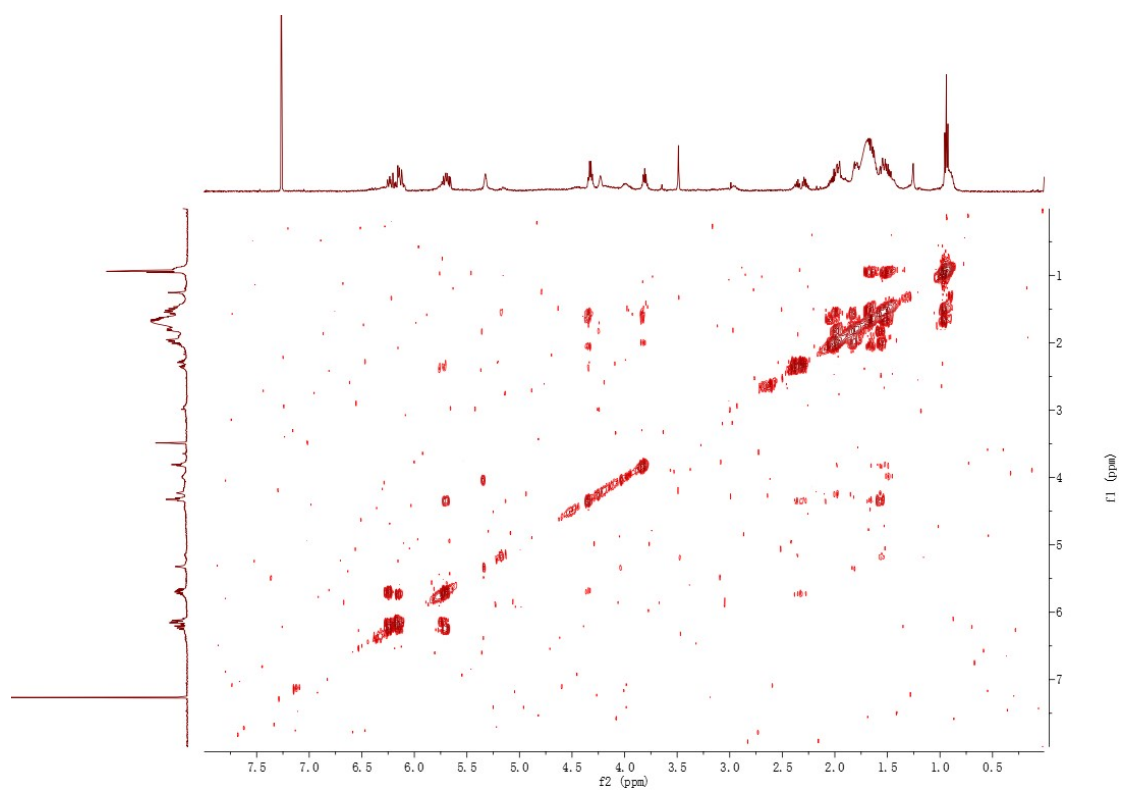

**Figure S15.**  $^1\text{H}$ - $^1\text{H}$  COSY spectrum of **3** in  $\text{CDCl}_3$

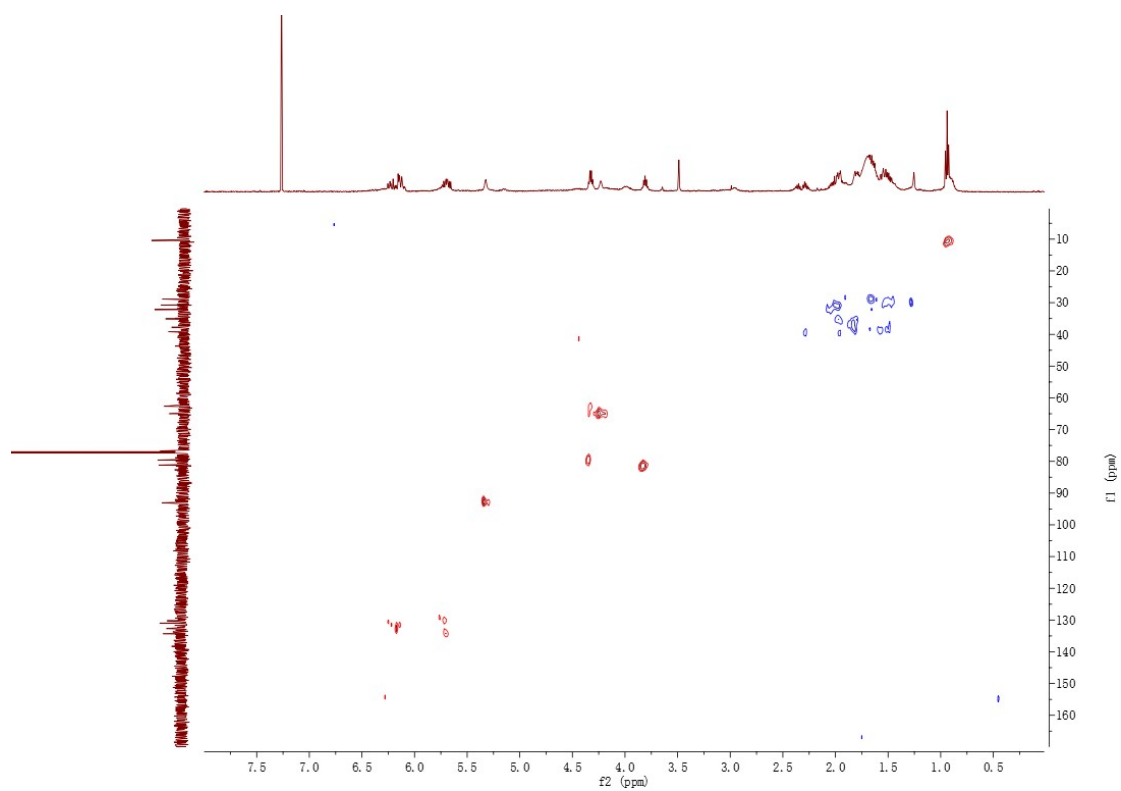

**Figure S16.** HSQC spectrum of **3** in  $\text{CDCl}_3$

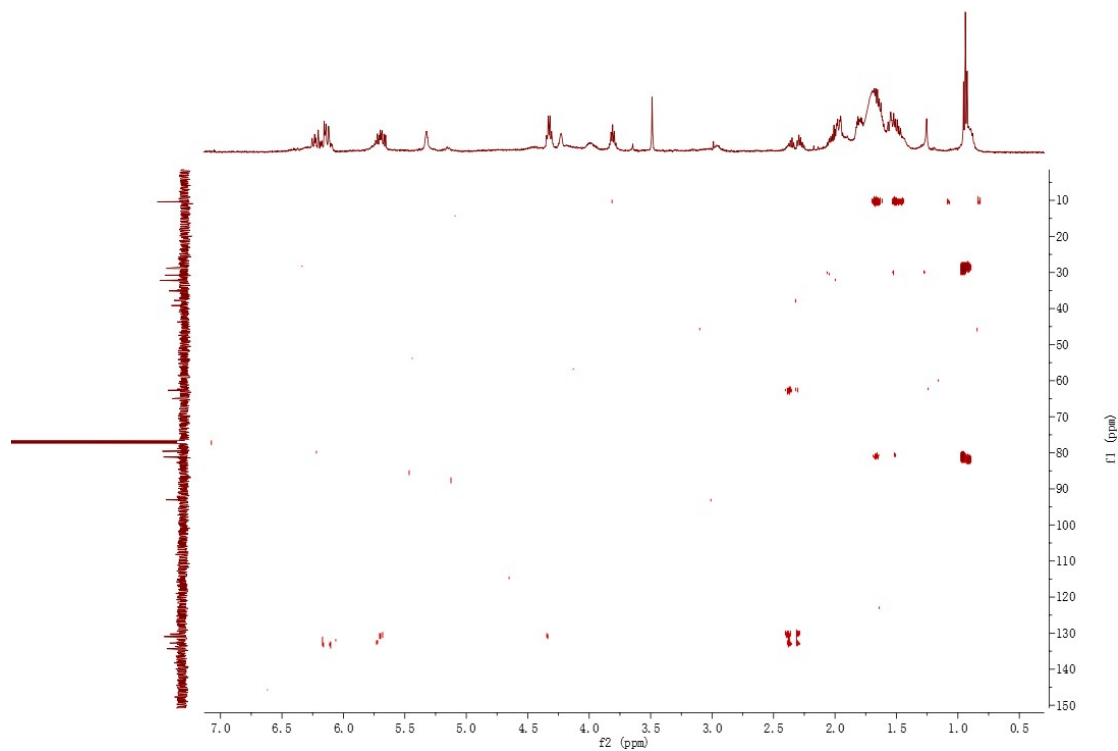

Figure S17. HMBC spectrum of **3** in  $\text{CDCl}_3$

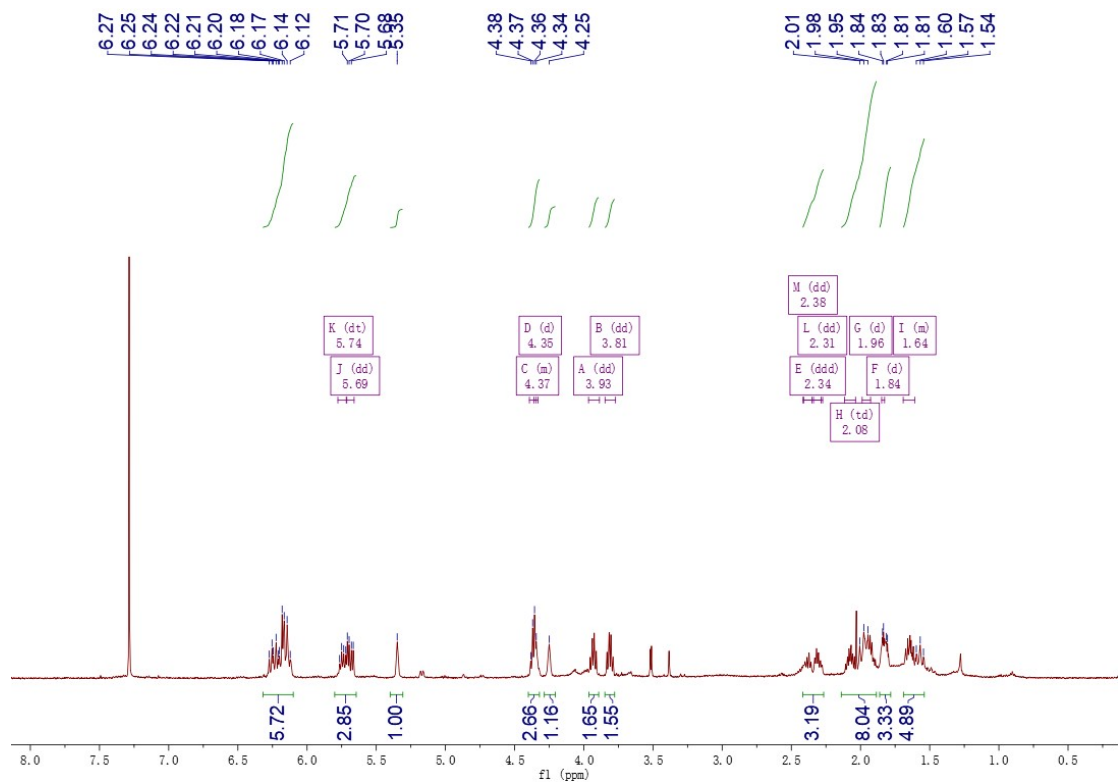

Figure S18.  $^1\text{H}$  NMR spectrum of **4** in  $\text{CDCl}_3$  (500MHz)



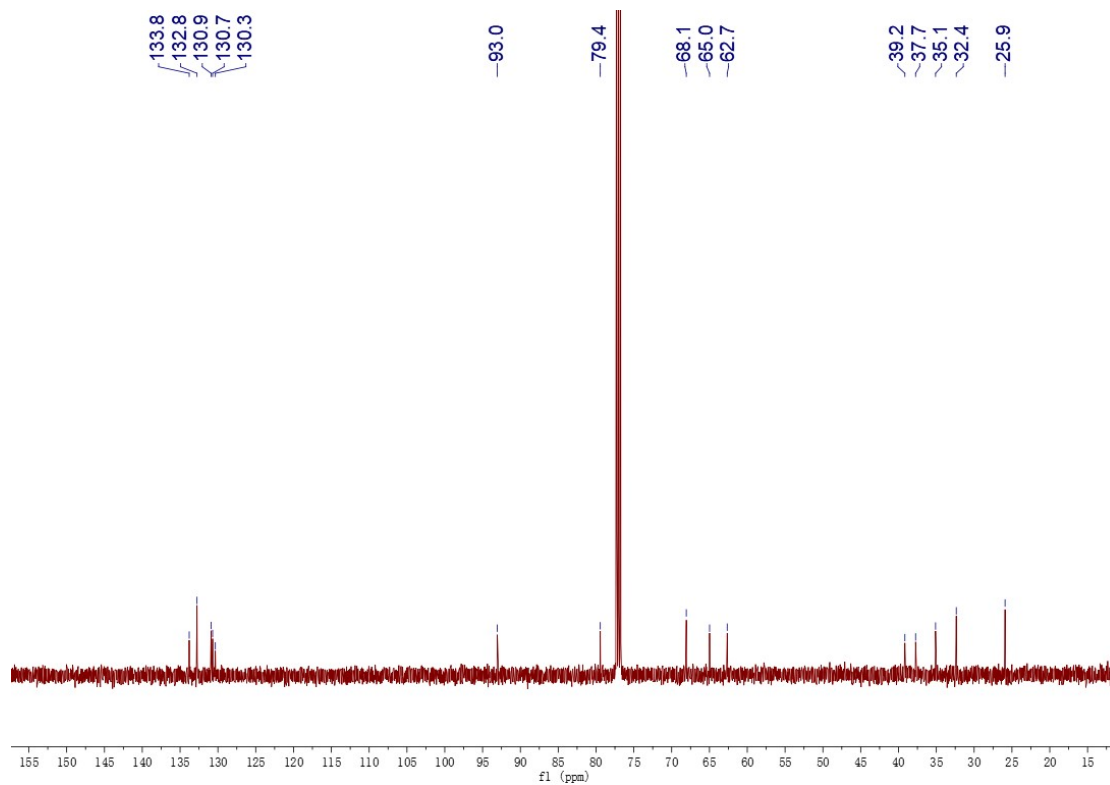

**Figure S19.**  $^{13}\text{C}$  NMR spectrum of **4** in  $\text{CDCl}_3$  (125MHz)

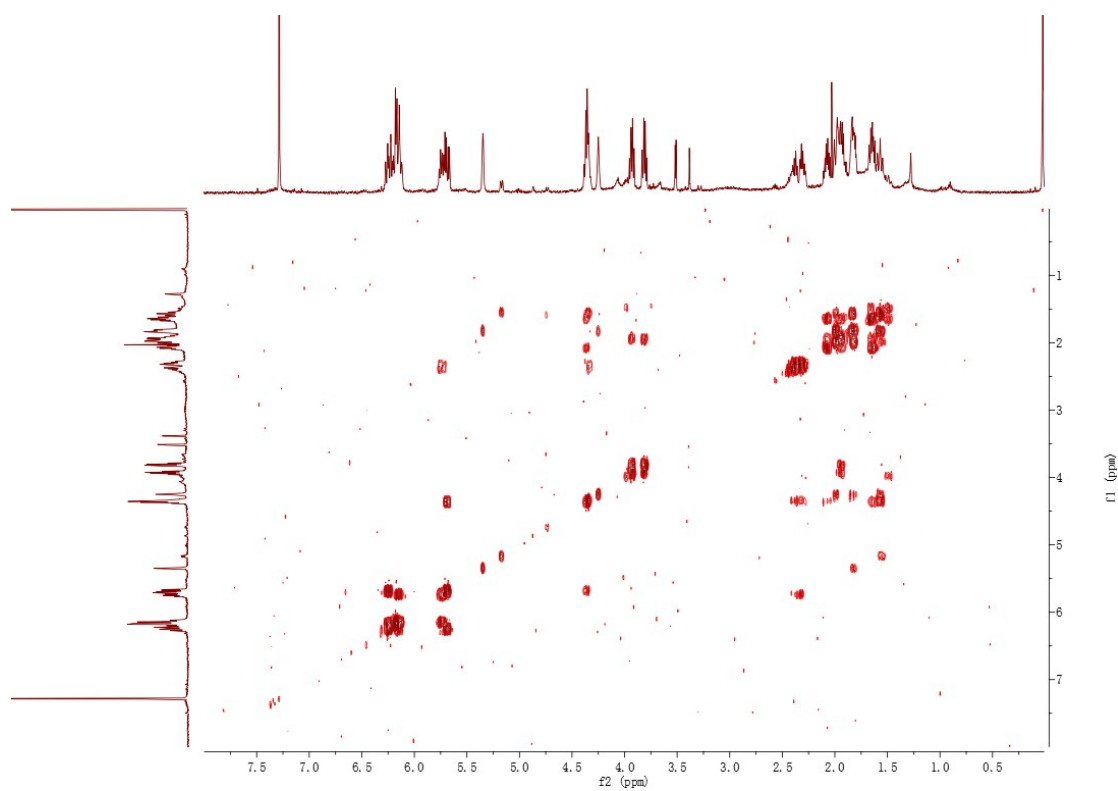

**Figure S20.**  $^1\text{H}$ - $^1\text{H}$  COSY spectrum of **4** in  $\text{CDCl}_3$

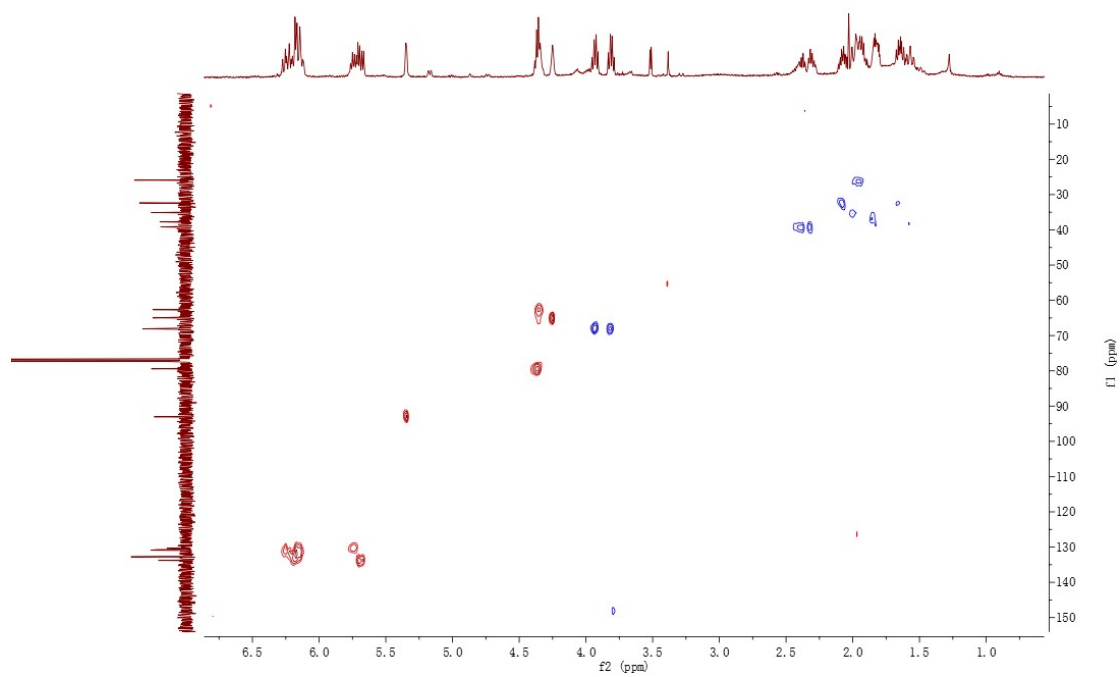

**Figure S21.** HSQC spectrum of **4** in  $\text{CDCl}_3$

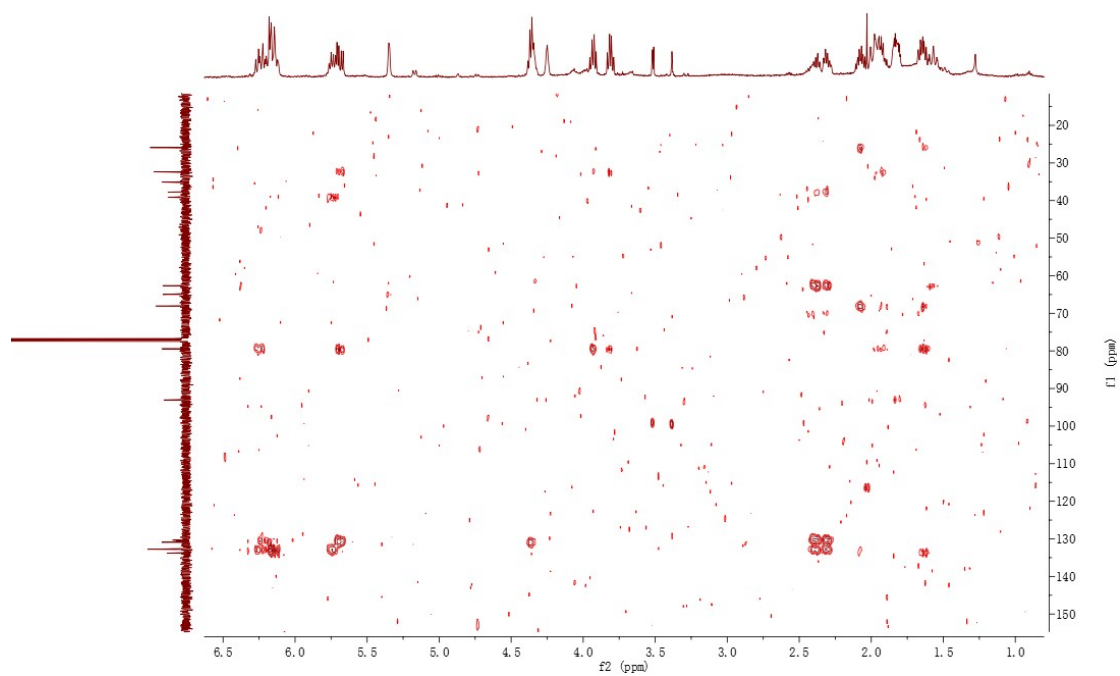

**Figure S22.** HMBC spectrum of **4** in  $\text{CDCl}_3$

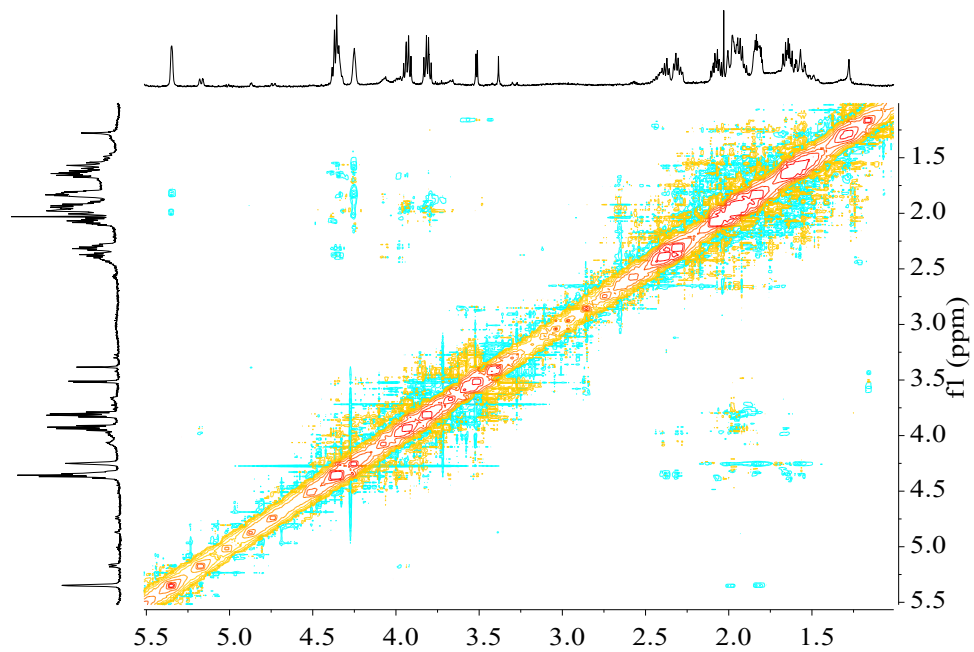

Figure S23. ROESY of **4** in  $\text{CDCl}_3$  (500MHz)

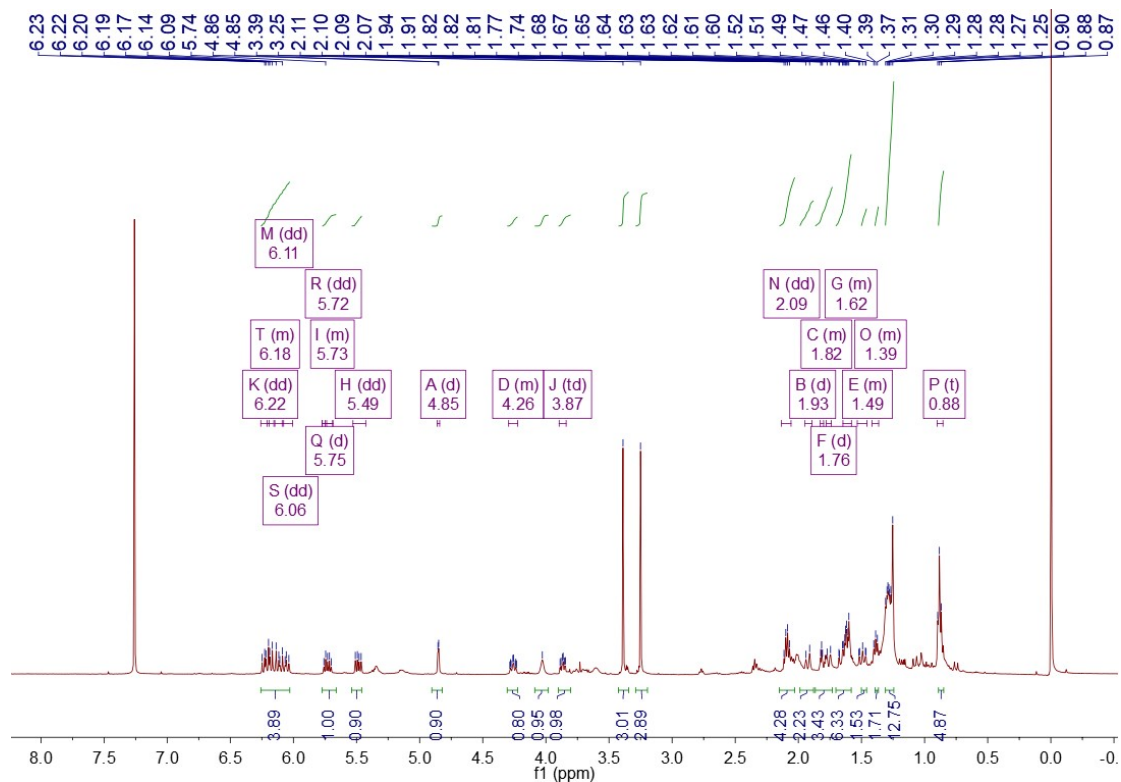

Figure S24.  $^1\text{H}$  NMR spectrum of **5** in  $\text{CDCl}_3$  (500MHz)

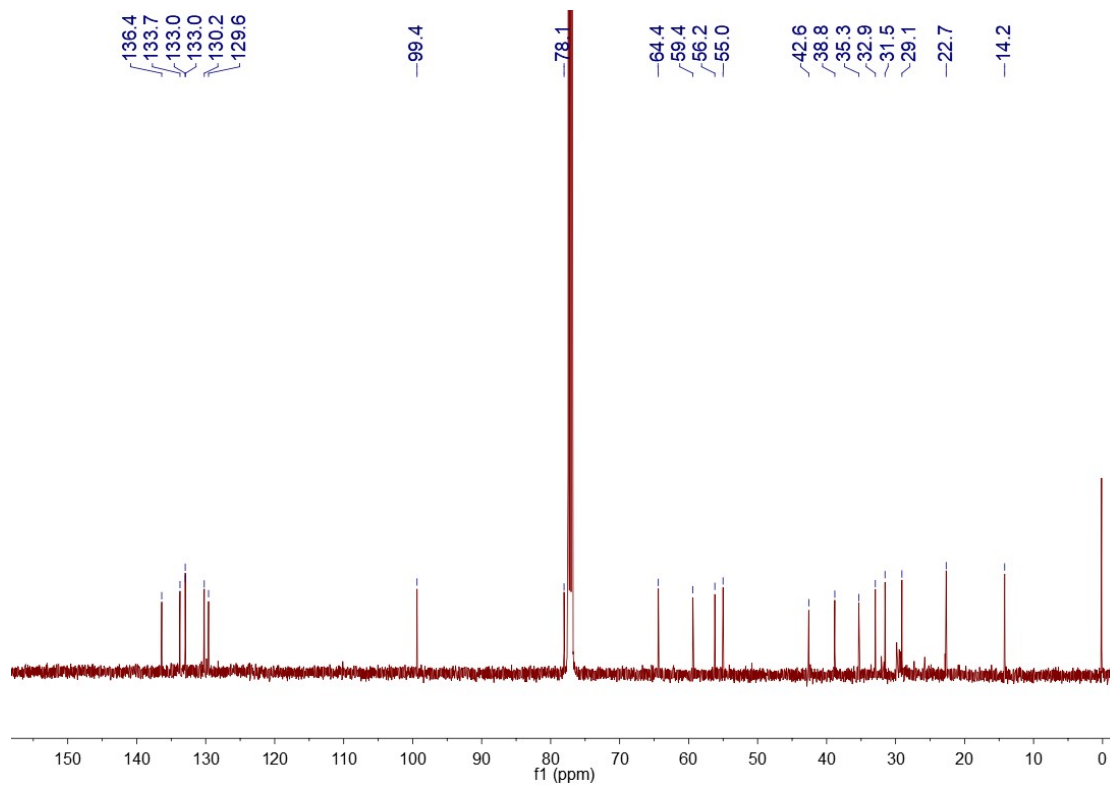

Figure S25.  $^{13}\text{C}$  NMR spectrum of **5** in  $\text{CDCl}_3$  (125MHz)

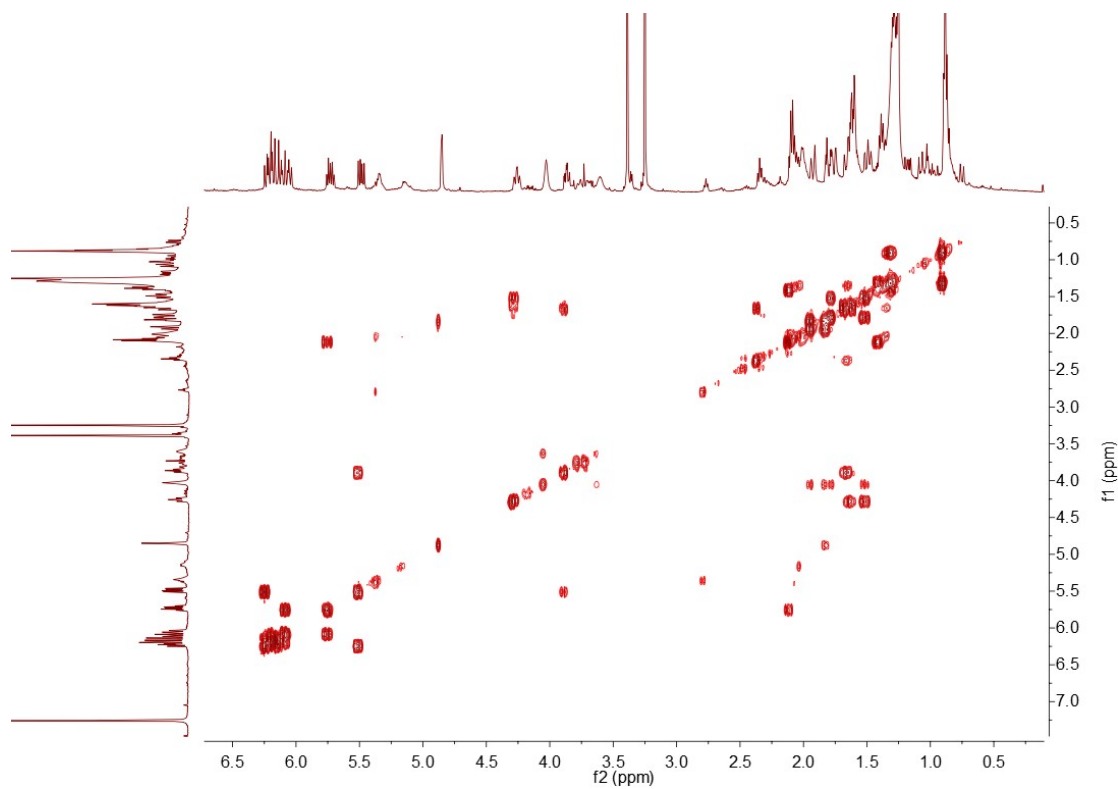

Figure S26.  $^1\text{H}$ - $^1\text{H}$  COSY spectrum of **5** in  $\text{CDCl}_3$

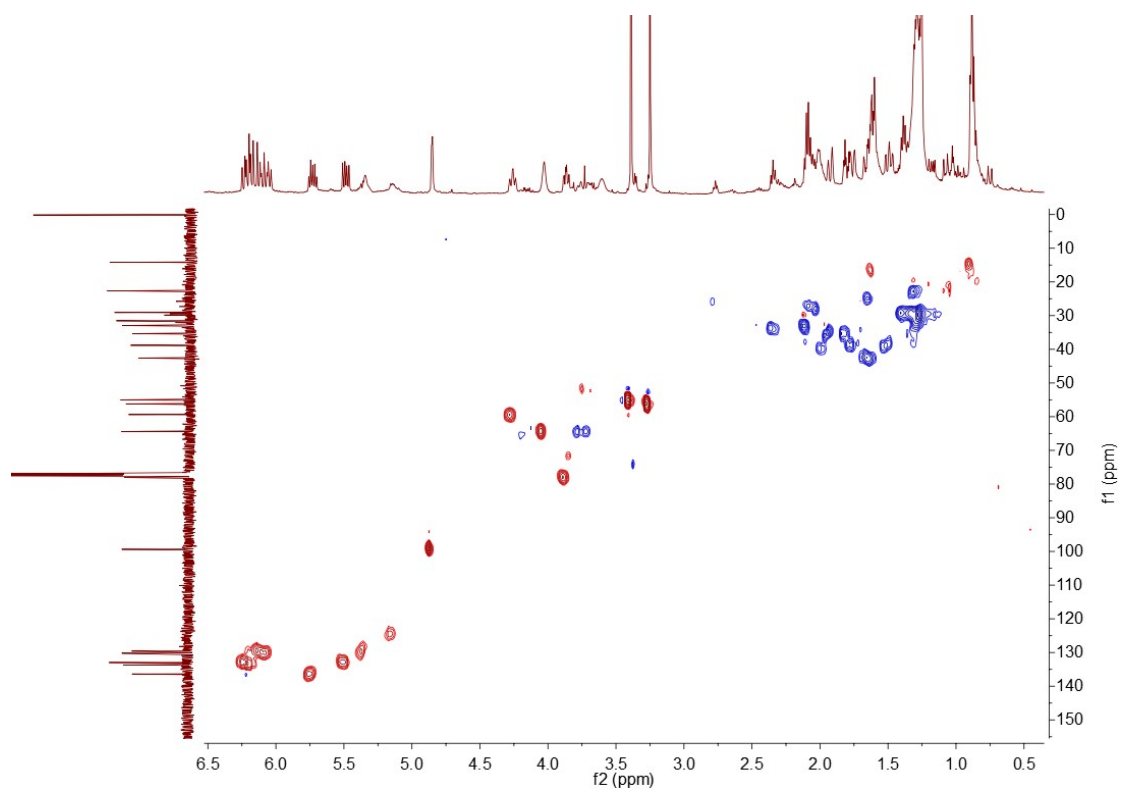

Figure S27. HSQC spectrum of **5** in  $\text{CDCl}_3$

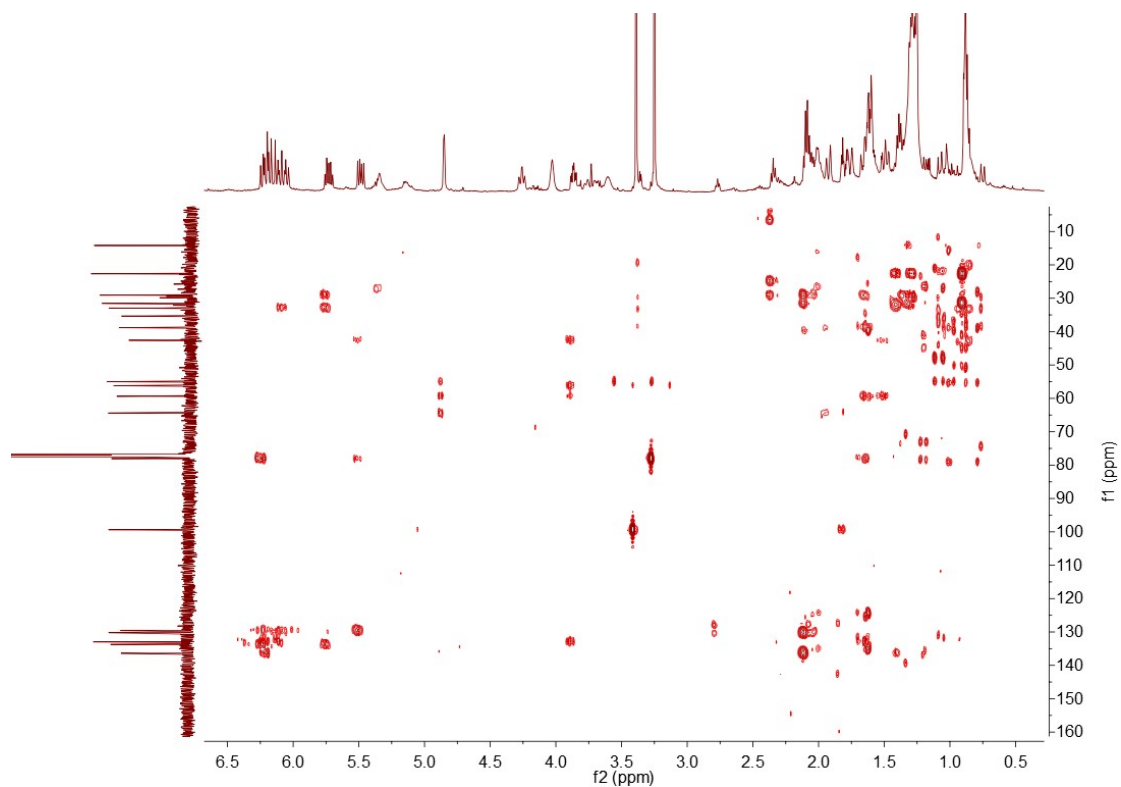

Figure S28. HMBC spectrum of **5** in  $\text{CDCl}_3$

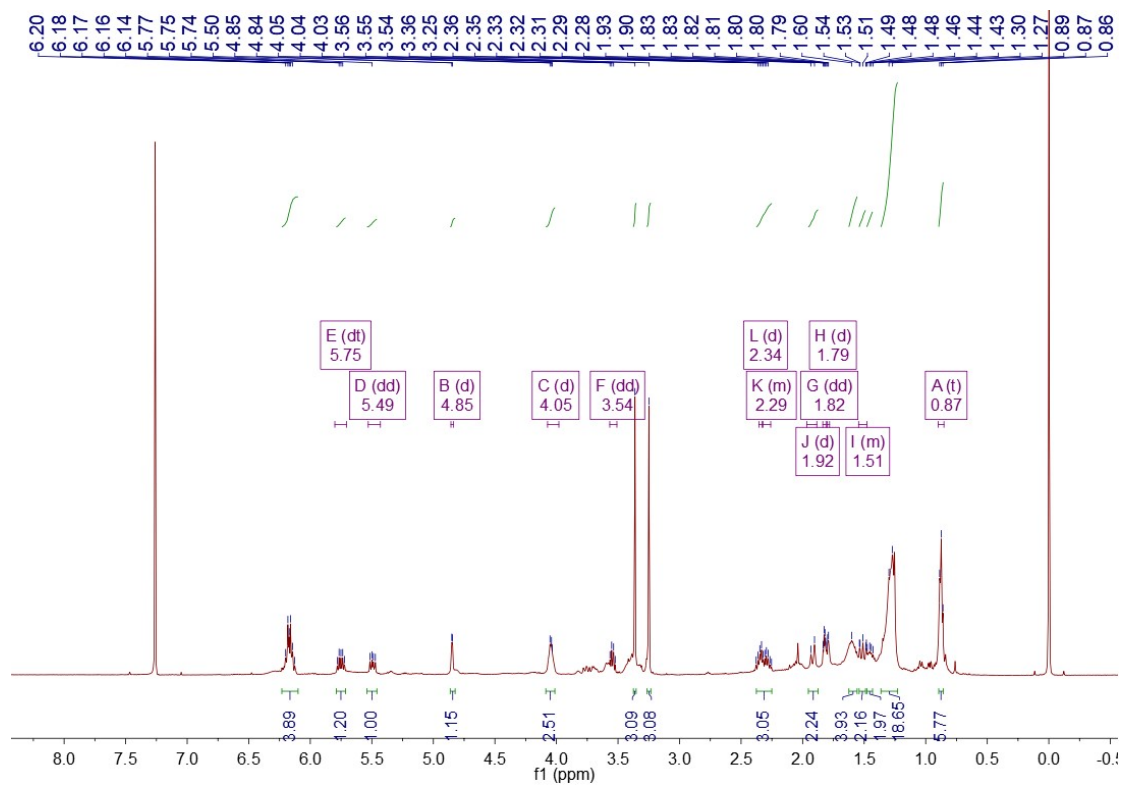

Figure S29.  $^1\text{H}$  NMR spectrum of **6** in  $\text{CDCl}_3$  (500MHz)

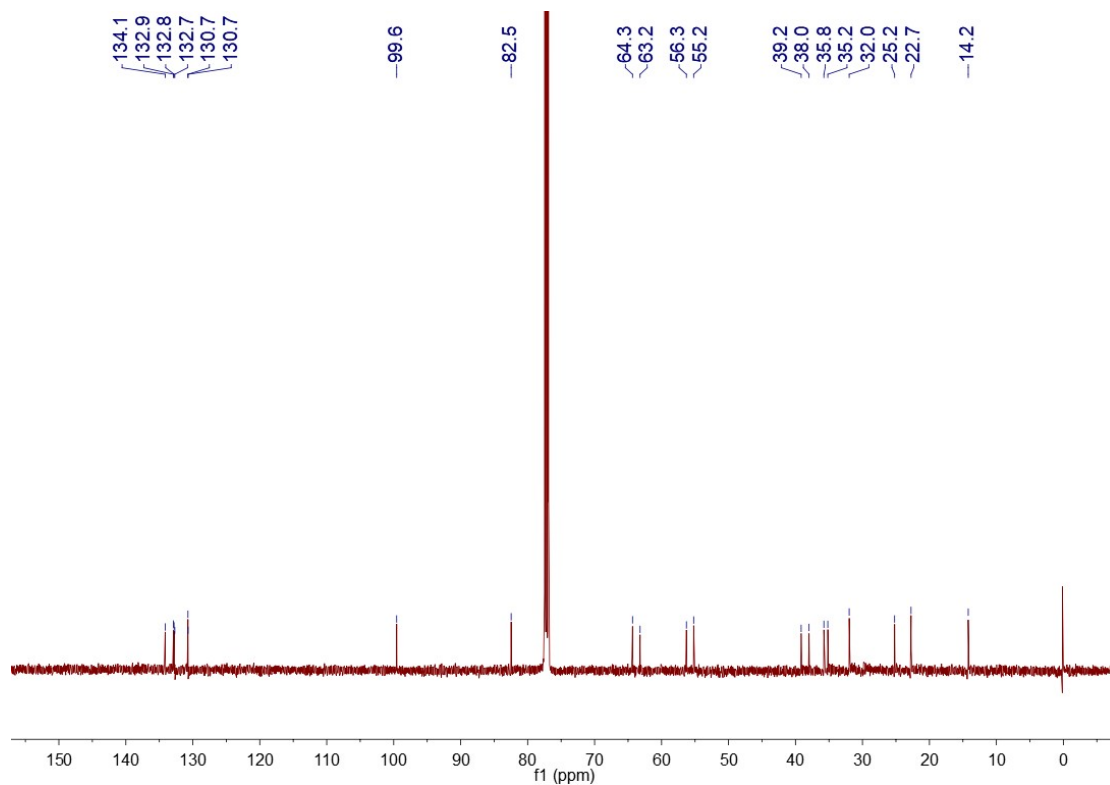

Figure S30.  $^{13}\text{C}$  NMR spectrum of **6** in  $\text{CDCl}_3$  (125MHz)

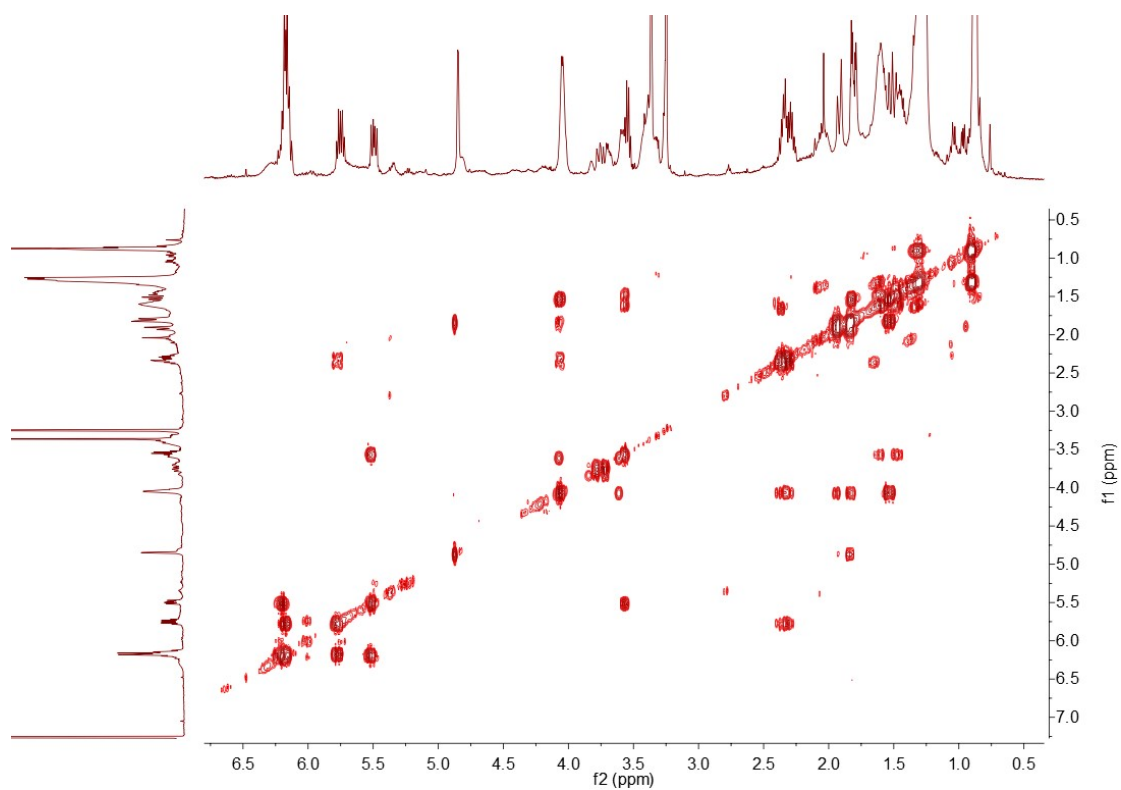

**Figure S31.**  $^1\text{H}$ - $^1\text{H}$  COSY spectrum of **6** in  $\text{CDCl}_3$

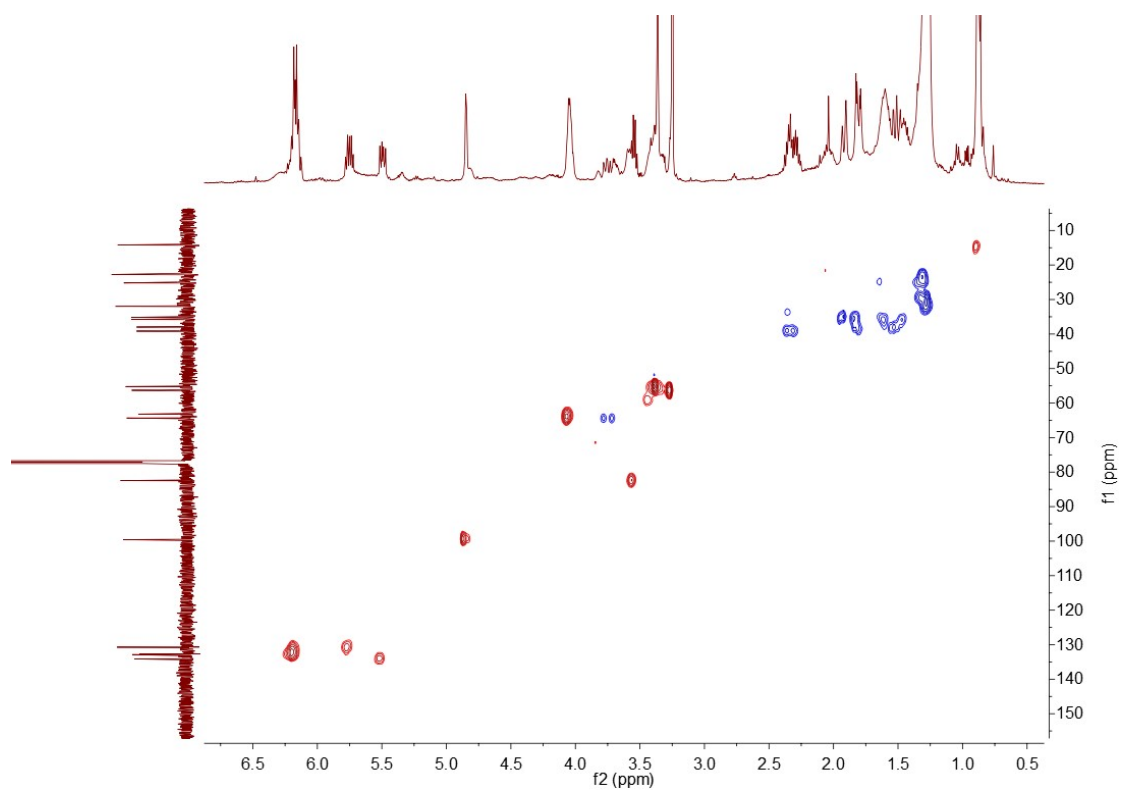

**Figure S32.** HSQC spectrum of **6** in  $\text{CDCl}_3$

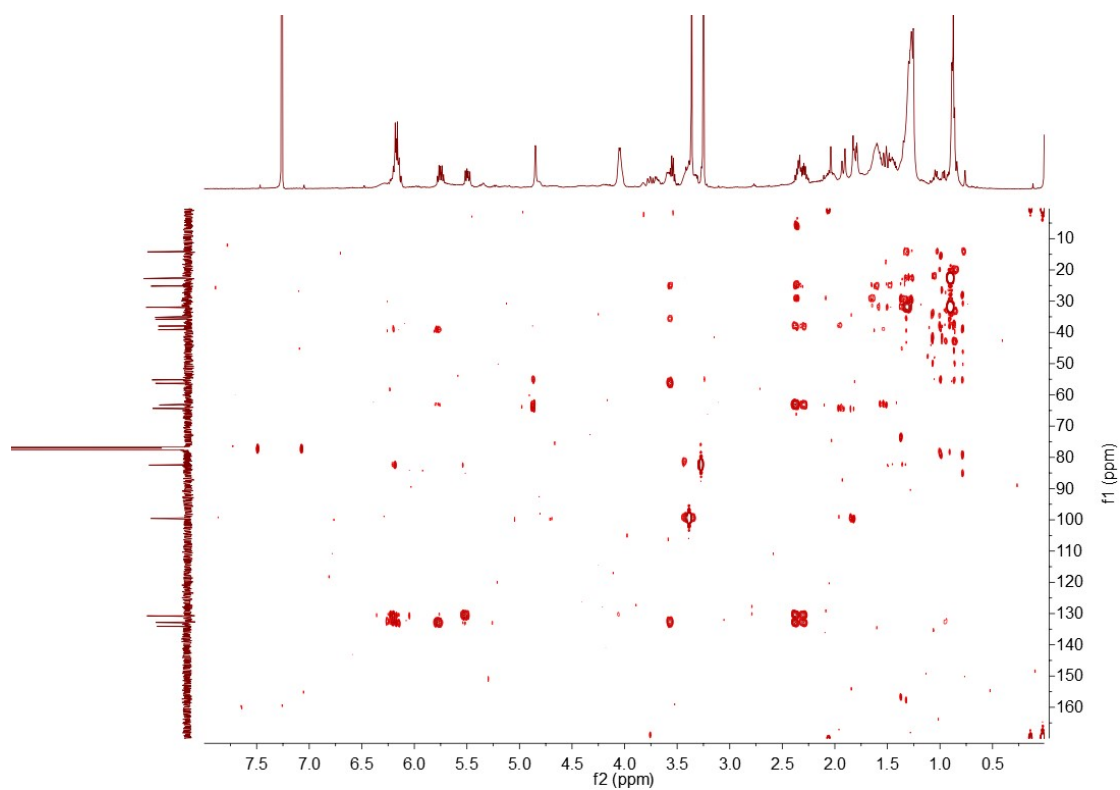

Figure S33. HMBC spectrum of **6** in  $\text{CDCl}_3$

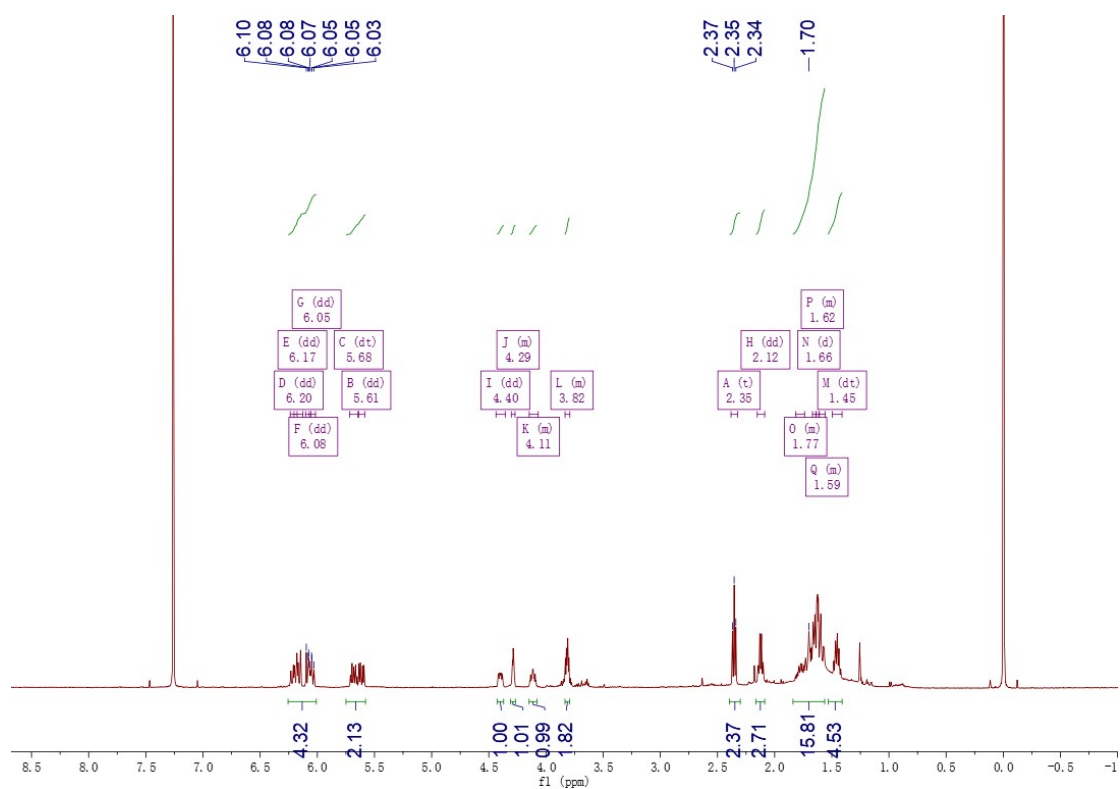

Figure S34.  $^1\text{H}$  NMR spectrum of **7** in  $\text{CDCl}_3$  (500MHz)



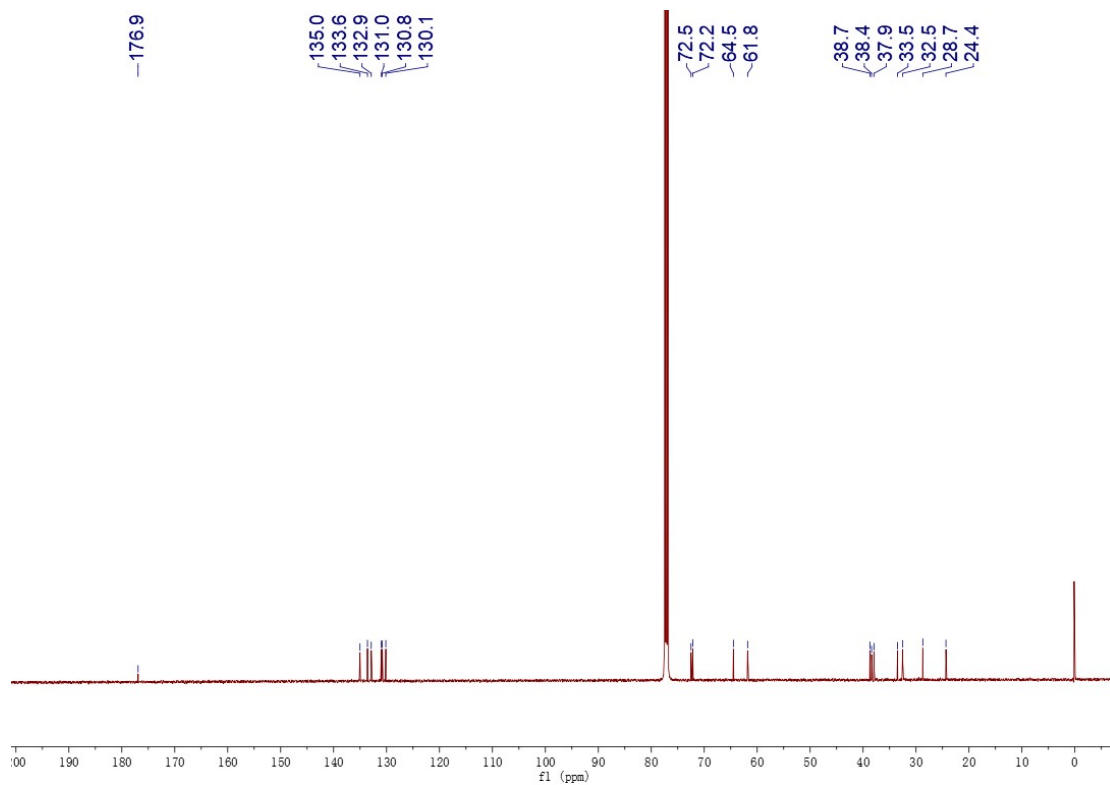

**Figure S35.**  $^{13}\text{C}$  NMR spectrum of **7** in  $\text{CDCl}_3$  (125MHz)

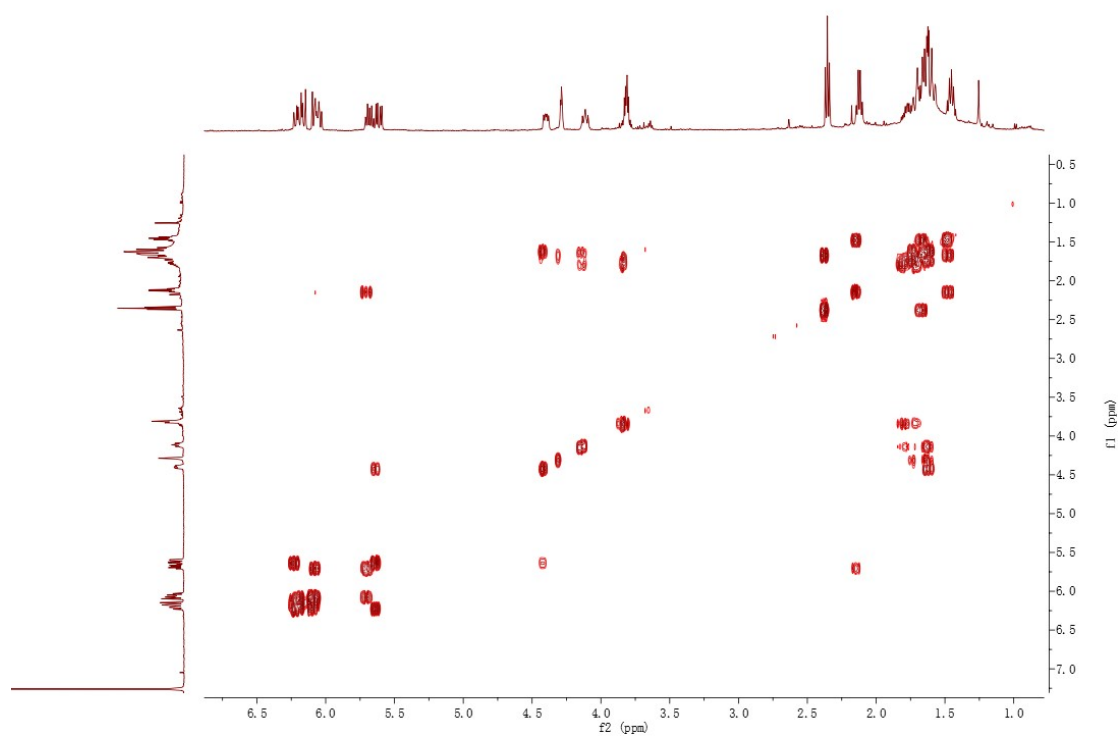

**Figure S36.**  $^1\text{H}$ - $^1\text{H}$  COSY spectrum of **7** in  $\text{CDCl}_3$

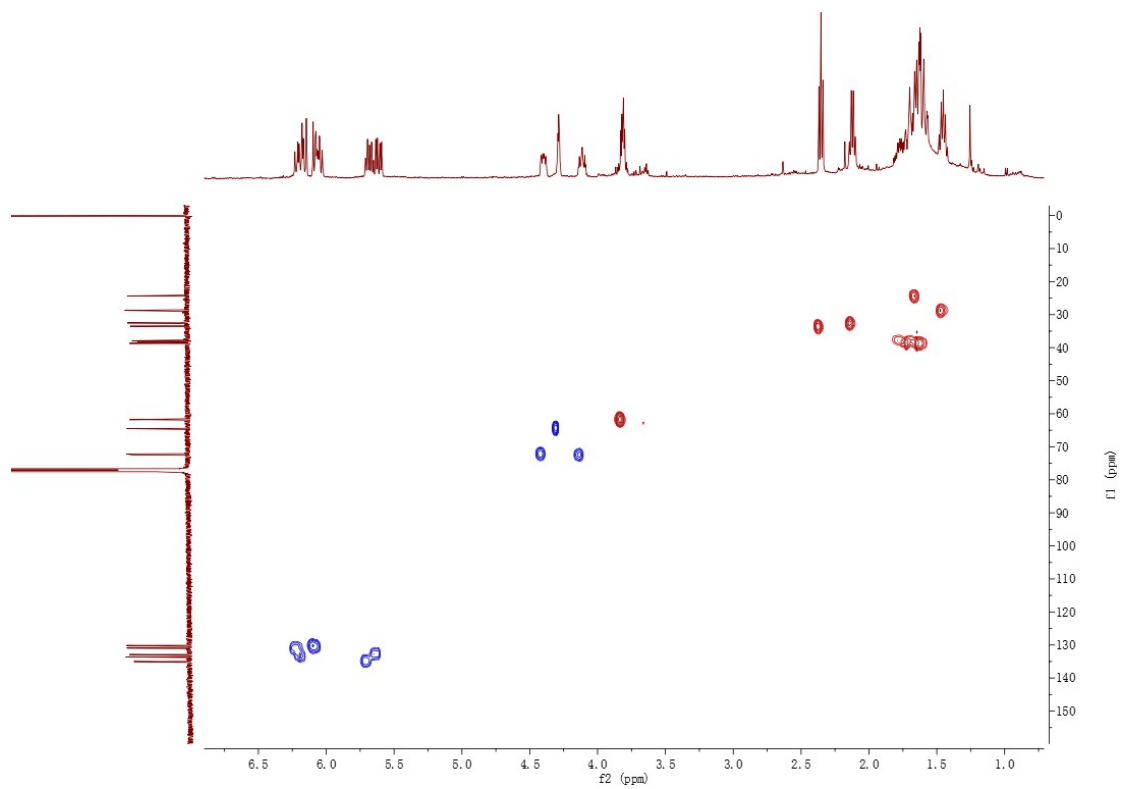

Figure S37. HSQC spectrum of 7 in  $\text{CDCl}_3$

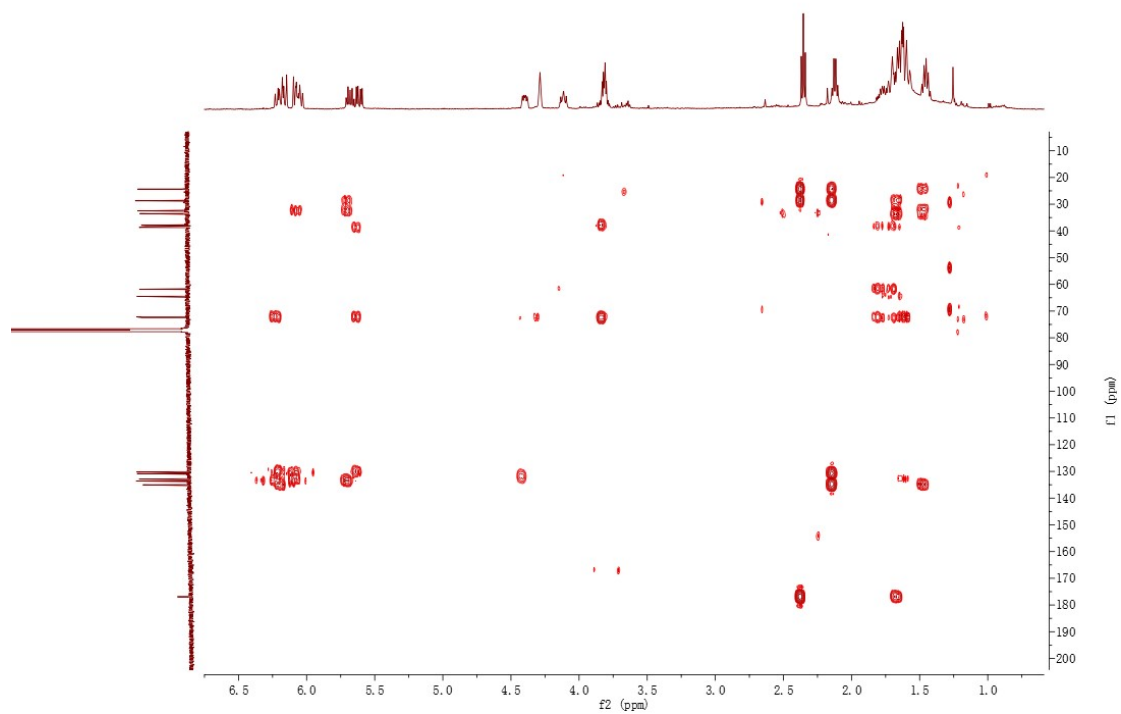

Figure S38. HMBC spectrum of 7 in  $\text{CDCl}_3$

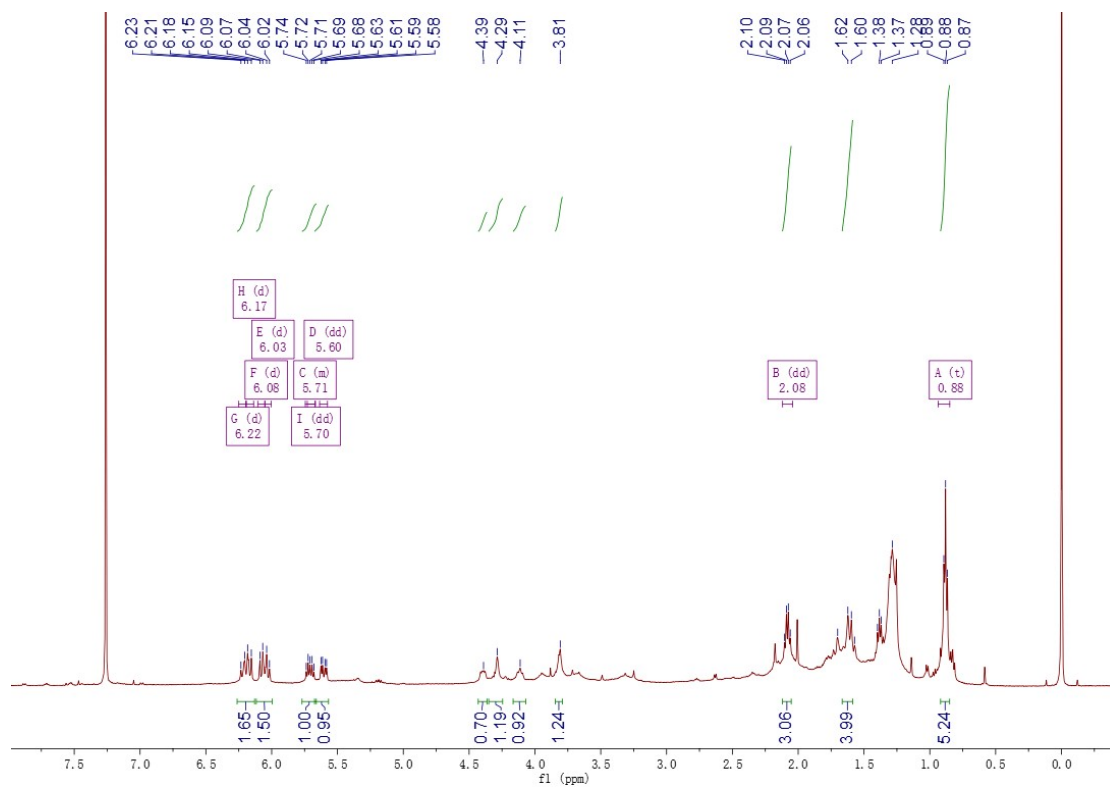

**Figure S39.**  $^1\text{H}$  NMR spectrum of **8** in  $\text{CDCl}_3$  (500MHz)

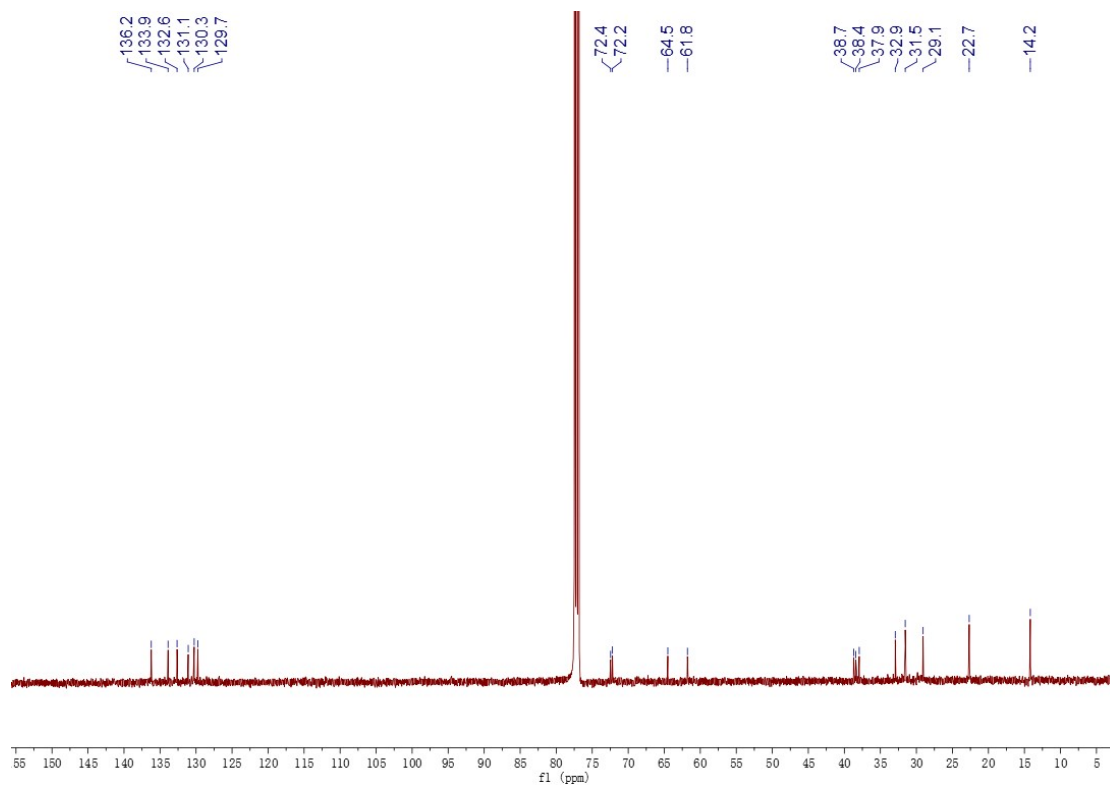

**Figure S40.**  $^{13}\text{C}$  NMR spectrum of **8** in  $\text{CDCl}_3$  (125MHz)

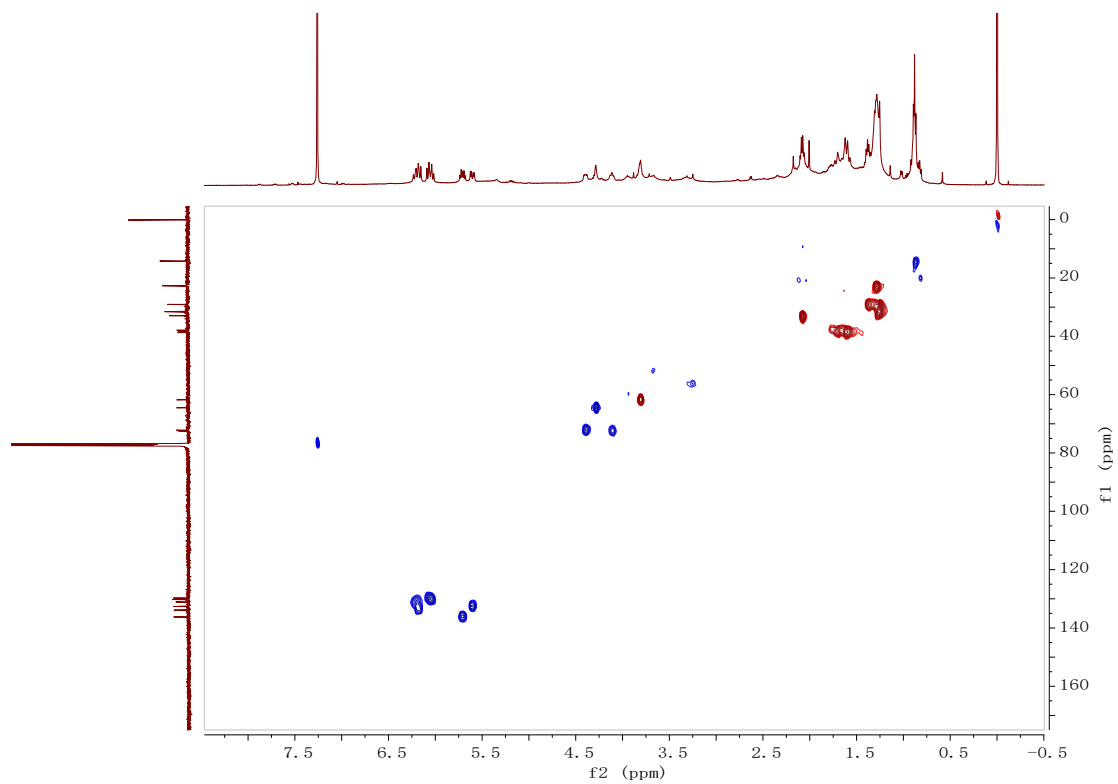

**Figure S41.** HSQC spectrum of **8** in  $\text{CDCl}_3$

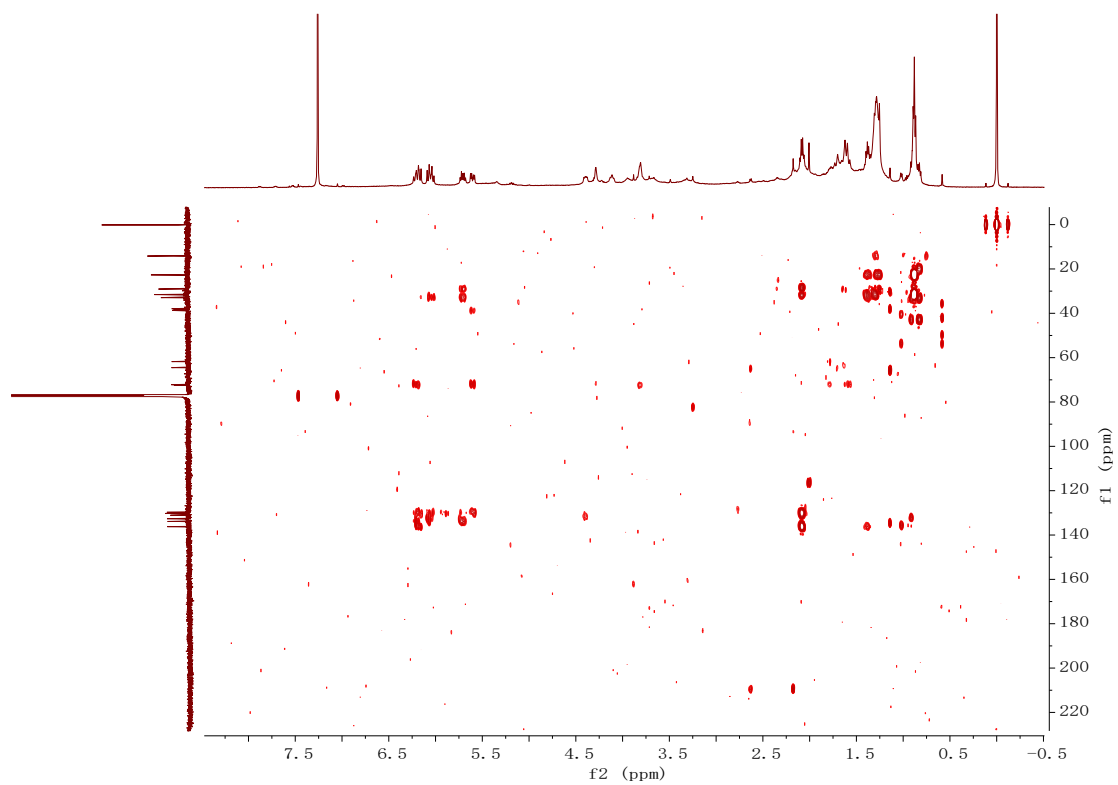

**Figure S42.** HMBC spectrum of **8** in  $\text{CDCl}_3$

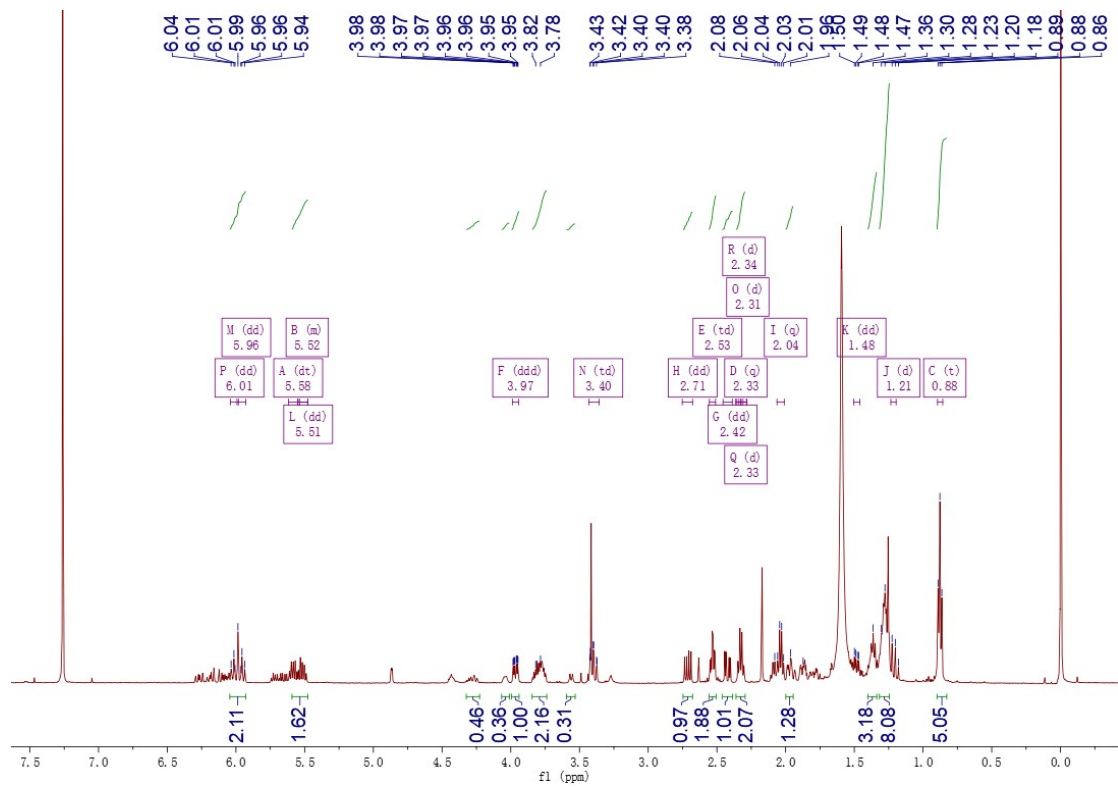

Figure S43.  $^1\text{H}$  NMR spectrum of **9** in  $\text{CDCl}_3$  (500MHz)

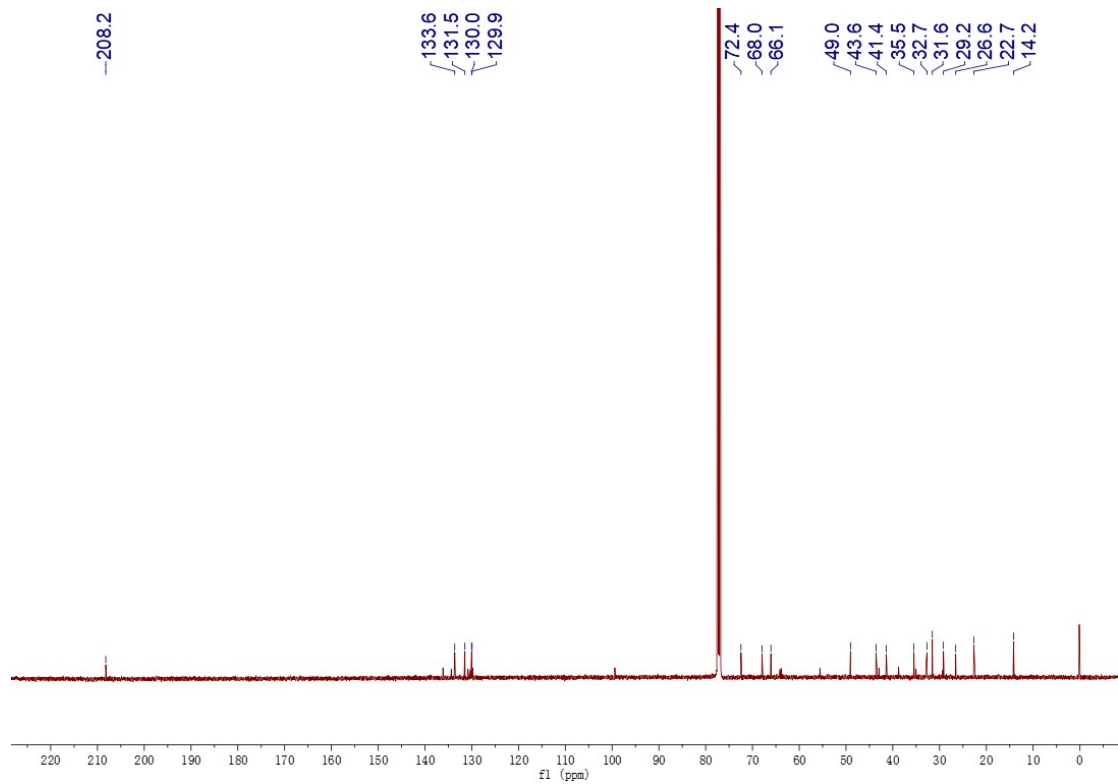

Figure S44.  $^{13}\text{C}$  NMR spectrum of **9** in  $\text{CDCl}_3$  (125MHz)

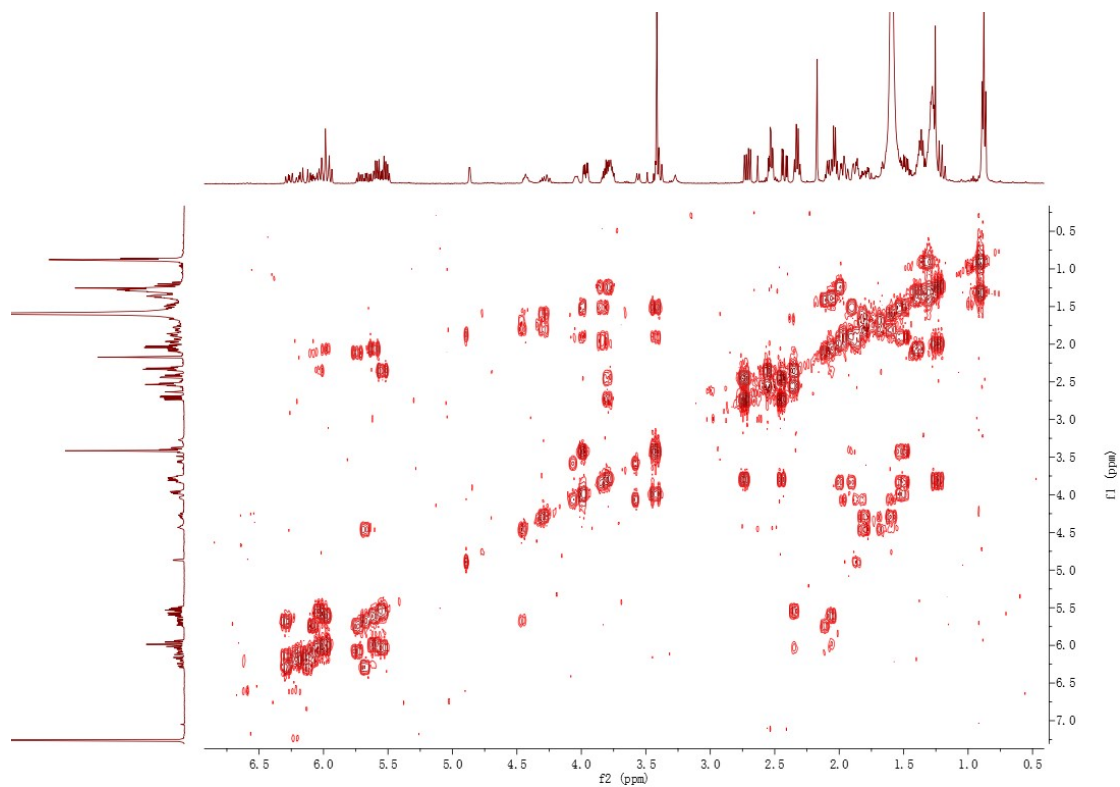

Figure S45.  $^1\text{H}$ - $^1\text{H}$  COSY spectrum of **9** in  $\text{CDCl}_3$

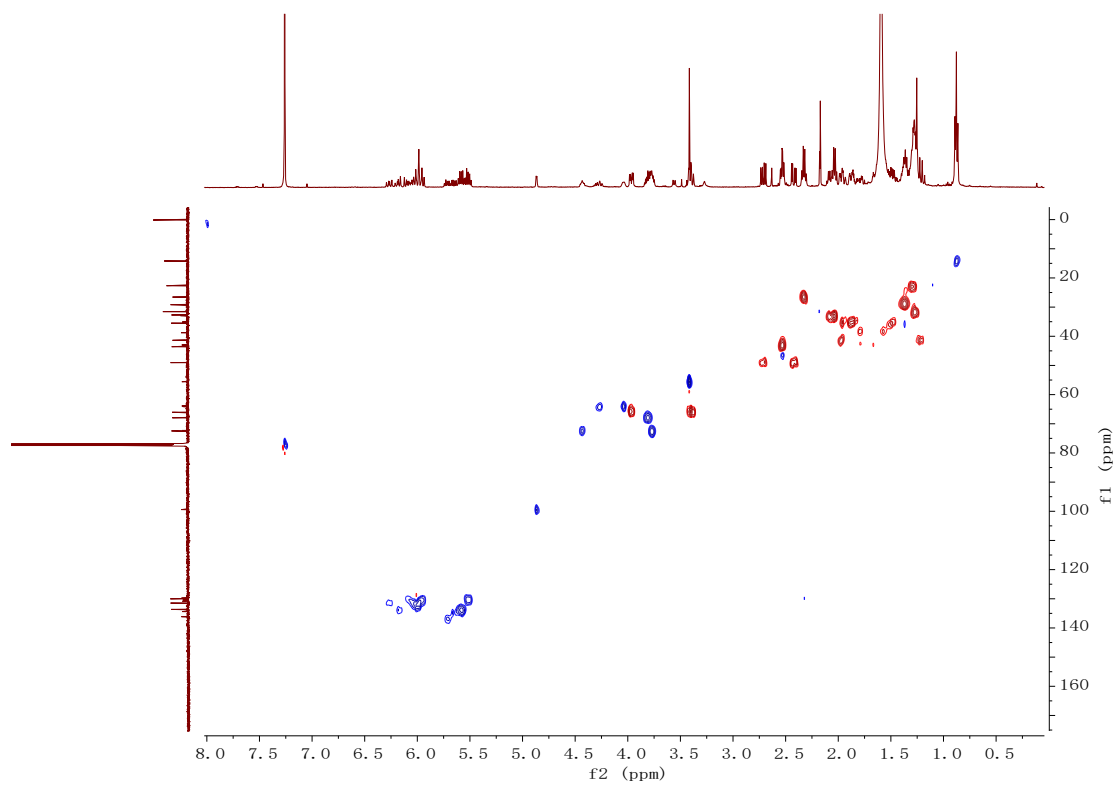

Figure S46. HSQC spectrum of **9** in  $\text{CDCl}_3$

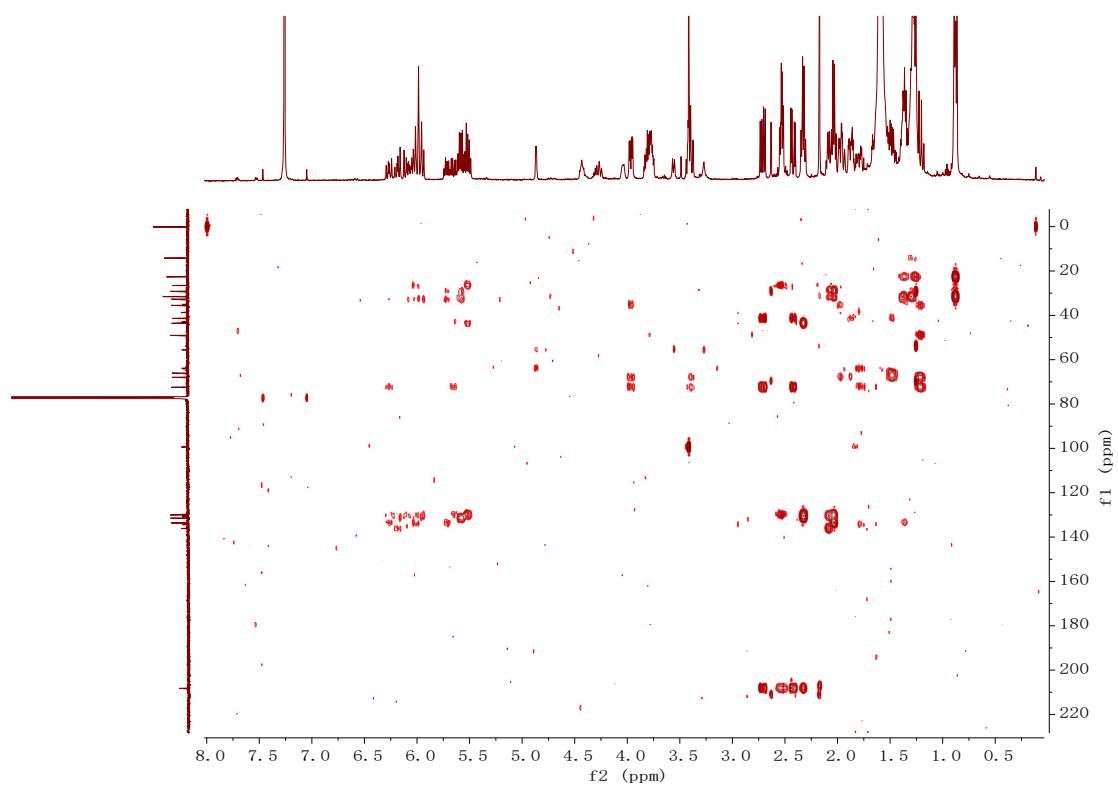

**Figure S47.** HMBC spectrum of **9** in  $\text{CDCl}_3$

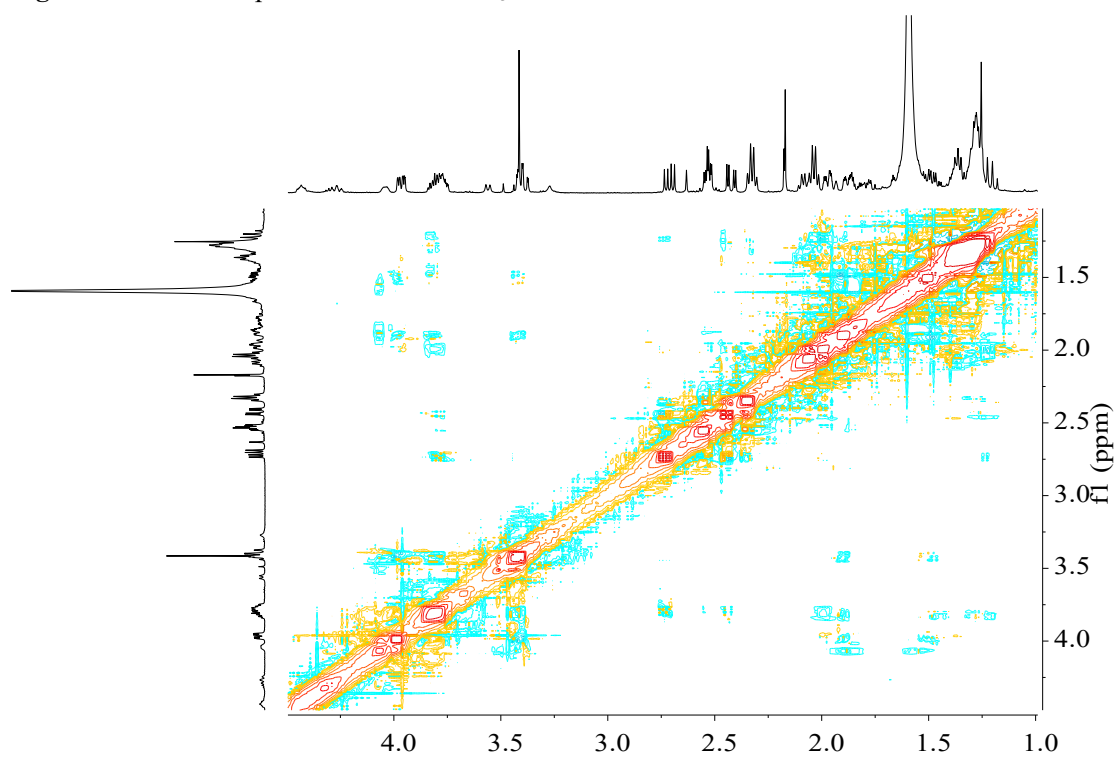

**Figure S48.** ROESY of **9** in  $\text{CDCl}_3$  (500MHz)

### 3. Supplementary nucleotide sequence data

#### Genomic sequence: *app1*

Size: 7634 bp

ATGTTCACTCTTGAGCCTGCTTTGGACATCCCTCCGACTCAGAGTCGTTGCTTCGACGCCATGCGAAGGACGCCATCGTTGTCACTGAAGCATCTATTTGAATGATGATT  
TGCAGGAAACTTCGGGCCCTTAGTGCCGTGTAACAATTGAAGACAATACCGTGTGCAITGTTGGCATGGGTCACTCTCAAAAAACCCCTTTAACACGACGCTGTTTTC  
TAATACATTCGGTGATTTACACAGCTTGCATCTCCCCGGCGGGAATCACTCAACATCGGGGCTTTGGGACTATGTTTACAACAAAAAACCCGCGCAAGGCACTGTGCCG  
TGGATCGGTATAACATCGAGGGCTTACCCACAAGGATGGTAGCAGGGGCTGGCGTCAAGCGTCAACGGCGGATACTTCTTCAAGAAGATGTCGAAAAGTTGATCCC  
TCGTTCTTTGGTATCAATAACCTTGAAGCGTCTTACATGGATCTCAGCAGCGAAAGCTGCTTGAAGTTGTCACGAATGCTTTGAAAATGCTGGTCTATCTATGGAAGAT  
GTGTCGGCACTAACACGGCTGTGATGTCGGCAACTCACTGTCGACTCTGTCTATGCAGTCTCTGTGATACAGACTACGTTACAGAGACTGCTGCTACTGGTGGTGGC  
ACTTCTATCATGTCCAACCGTATACGCCATGCTTCAATTTGATGGCCCTAGGTTAGTTACTTCTGCTCTCGGCTTCTCCGGAAGAGGGGCTATTGCGGAACTTCTGAA  
CGCTCGTGCAGAGGCTTTAACCGTATCTACATCAGCGATTGTGCTGCTGCAATGAAGAGTGACCCGAAGATCCATGCAGTCACTCGTGGAAAGGGCCATCAACCGGTAAG  
TCGAGTATCTCAGCTCAACGGAAATAAATGGCTAATAAGACAAAGCAATGGCAAACTCTGGCATTACCTTCCCGATGCAAGATGCAAGGCTGCTGTAATCAGAAA  
AGCATACCAGAATGGCCGCTTAACTTTGGCGATACCAGTATGTTGAGTGGCAGGCACTGTTACACCAAGTGGTGATCCGATAGAGGGTGGATGCTATGCGGGCTGTT  
TGACGGCTGAGAGGAGCCCTTGAGAAATGGATCAGTATGTGTCATCCATGATGTTGCTCCATGTCGCATATACGTTATGATGCAAGCCATCAACGGTGAAGAACGCTG  
AACATGGGTCAAGTGAAGCCGCAAGCGGTTTGGATCCATCAAAAGTTGGCTGCTTCTTTGAGCAGGGATAATCCCAACCCACTTATGGCTGGAAGAACGCTGAACCC  
CAAGCGTAAGACCCATCTTCAATCACCACAATGACATCGAGAGGCAATTCGCTGACCAATTTATAATTATAGTGAACCTCAAGGAGCGAAATGAAAGTATTGACCGA  
CGTCGAGTCTGGCCAGAGCCCTCGCCGCGCTGGTGTAAATTCCTTTGGTTACGGCGGTGCCAACGGACAGCTTACTCTCGAGTCTATCGAATAGCTACTCTGTTGGCT  
TGGCTTACTCTCCCACTCAGAGGACTTGTCAAGCCTATGATTTTCGAAAGGATGATTTGAGTTCCTTTGCTTCTTCTGCTCTTCAAGCAAGCTTCAAGGTTGCTG  
GTAAGCAAGCTATTTCCAGCATGGAAGAAGTGAAGGCAAGTCTCTCAAGGCCCTTGTGCTGCTATGAGCAAGCGACAGGCAAGATGCGCTCGCCGACTACGTACTC  
CGTGCAGAGAATGGCCGCTTAACTTGGATACTGGATGTCGATGTCGATGTCGGCGCAACTGATGGCTGCTGGGCTCACTGATGCTGCAATGCTTGAAGCAAGCTTGGC  
GGGCGACAATACGCAAAATGGAAGAGGCTATCGAGCAAGATACCGGCTTTTGGCCAGCACTTGTGATCTCGATGAGGTTTGTACTCTTACCCGCGAAATGCA  
AGCCCTCTGGGCTTTGGAGCAACTTCTGACAAAGCTGCCACGAGTGAAGTAAATACGAGCTCACTCGTAGCCAGCCGATCTGACCCGAGTTCAAGTGGCTTCCGTA  
ACATGCTGGCAAGCTGGGTGTGACGCCGAAGGCTGTTATCGGTCATTTCTTGGAGAGATTGCTGACGATACGCCCGCCGCTCTTACTGCTCTGAAAGTATTCTGG  
CAGCTATTTCGCGGGCTTTCAGTTGGTCAACTTCGGCTTCGCGGCAACTGATGGCTGCTGGGCTCACTGATGCTGCAATGCTTGAAGCAAGCTTGGCCTGG  
TGAAGTGGGAGTCCGATGTGTCACCGCCCTGAGAGGCTTACTATTAGTGGAGTGTCAAAGATATTGATGCTTCTCAGTCTGAACTCCAGAAAGAGGCAAAATTTGCT  
CGCAAGCTTGAAGTGGTGGCCGTGCCCTACCCTCCTACATGATGGTTCGAAATCGGCGACCTGTACGAGTCACTTGTGACGCTTATTTCGCGCAAAAGTTGCTGATGA  
ATTGAAGCAAGATGTTTCCAGGTCGGTCACTGCTAATGCCATTTGGCGTGTGATCTCCACCAATATGGCATCTTACTTCCGGAAGAACTTGAAGCAACTGTT  
CAATTCAGTGGCGCTTGAACAGCACTTCTCAGGCGACAAGTATCAATTTGATGAAATTTGGTCTTACTTGTCTCAAAGGCTTCAAGGCTTCCGCTTGAAGTGA  
AAGCGGCAAGGACCGCTCCCTACTCTCCACTTGTGCGAAAGGAGAACCGGATATCTGCTTGAAGAAGCTTGGCGGCTCTTCCCTATGAGCCACGACCTC  
GACTGCTGAGGCTTGAACAGCTCCGCGATACCGTGGCTCCCTAATCTCTCTTCTTATCTTGGGACTACTCAAGCTCTGCGGCTTCCGCTGCTGCTGAG  
GTGTTGAGCAGCTTCCGAAAGCTCCCGCTCAGAGCTCTTGAACACAAGTAAACAGCAGGATTAACGGTATCGAGTGGTGTGCGGCAAACTCCCCCATGCTGTGAG  
ATGCTTGGCTGCGTGGCAACAGCTTGGCAGTCAACAAGTGGTTTGGCGCACTGATGGCAGTCAATGGCAGTGGTATCGAAGCTCTCAAGCTCTCAAGCTTCAAGC  
TAAGCTGGTGGCGGAGCGCTTCTTTCGATTTGAGAATATCAATAAGCGGAGCAATTTGCTGCTGACGAGAGCGGCTGAGGCTGACAGCCTGAGCTT  
ACAGCTCATGCTCTCCAGGATCTTCCGCAAACTCAGCTGCGCAATTTGATGAAATTTCCATCTCTCTTGGGTGCTGGTGGCTTGTGACTGCTGAGTGGT  
CATCCGAGTCAAGGATGAAGCCAGTACGGATCTGCCCTTATTCAGGACAAGGCAAGGCTGGGATGAGCGCTGGTATACCAAGGCAAGGAG  
GAAGGCTCAACTTTGGCCCACTTCCAGTCTGACAAAGTGTGACACAGGATGGCAACAGAACTTCAACAGATTCTATCGCGCACTCTTCTGGAACCTCCGCTCCGA  
CTGGCCACCGCATGTTCTACGGCTGCACTATCACTATCGATGCTGCTTCAAGCAGCATATGGCGGTACTGCTGTAATATCAATACGCTTCGAGCTTTTGA  
CCAGTCTTCGTTCCAGCTGCTTATTCAGATTCTCGGGGAGGAGTCCAGTCTGGGCAAGAGGAGGTCGGAATCTACTACCGGATGGAGAAAGCGGCTTTTCTAC  
CCGTGCTGTGCTTTACTCTCGAATTTGCCGATGGCACACTGCTGCCATGATGATGCTGCTGTTTCAAGAAAGCTCTGGAGCAAGGCAAGGAGATGGCTCTTGAATTTCCGA  
CATCTATCTCAACGCCAGCTTGTCTTGTGTCATGGAAGCCAGATGTTCTGCGCTCCAGCCAGGCTGAAAGGCTATTCAGGAGTATATTTCTCTTTGCTGCT  
GAACAGTCTGACGATTTGAATGACAACCGGGCCCTTATTGATTTGCAAGTCTTCTGCTTCTCCGCAAAAGGTTCCCGCTATGAGCGTTTGGAACCTCGGGCAAGAG  
CGTCAATGGACCCGAAAGGATGGCAATCCATTTGCGGCAAGGACATGCAATCCCTCGTTCCGAGTTTGAACGATGGCAAGCTTGGTGGAGCAATAAGATGGCAT  
TGAGAATGCCAAGGAATCCAATCCCTACGATGCTGTTGATTTCTCATCTGCTGTTTCAAGAAAGCTCTGGAGCAAGGCAAGGCAAGGAGATGGCTCTTGAATTTCCGA  
CGACGGATCATTTACTCGGAAAGCAAGGATGCCATCTCCGCTTGAAGGCTACTGGCTTGTGACTTATCTCTCCGCAAGGACTCTATCGAGTGAAGAGCC  
CCAAGAGACTGTTTGAAGGCAAGGAAGTGAATTTGTCAAAGCAAACTTCTTCTCTCCATCGATTCTTGGCTGCTGCTGACTGCTCACTGAAGAGCGCTG  
GTGTTGCTCAGCTCAGCATCGCTCTATCGCCAAATTTGAGTCTGTCAATTCACAGCAAGTGTGTTGATATCTTCTAGAGATGGAACCGCAATTTTGGCCACAT  
CAGCGGGAAGACATGGATCGTCCGTAAGATCACAGACAATGTCGGTATCTTTTGGTCAAGGAGCAACATGCTTTTGCACCCCAACCCTGATCTCACTTGTG  
TAGCGGCTCTCTCAGGCTCATGCTAGAGCAGCGGCAATTGAGGATGCTGTTTGGACATTTGGAGTGAATACCAAGCCCACTCACTGCAACTATGCAACAA  
CGTCTCGGAGCCTTGAACATTCGGTACGAAACAGACGATAACGAAATTTATCCAGAAAGATGGAATCCTTACGTCAGCCGTTTCGCTGATGTTGAGTTGAACTCCCT  
GTCCGACAGCGTATGACTCCGATCACTAAGAGTGTGCTTGAAGAGGTTGGCCAGCCAGCTGCTATTTGGTCAAGTGGAAAGGACGACTATTCACCTTCA  
GCAAGTCTGAGCGCAAGGACCGCTCCAGCTGGTTTTGGGATGTTGATCTCCGAGCTGTTGGGCTCAAATGCCAAAGACATCTACGCCCTCAATGGTCTGCGCGAGA  
CTGATCGGCTACTACTGCTTGACTTTGGTGGTGTATCTCGGCCGTTGGACTGATGTCAGCAGCTTAAAGTGGAGACCGGCTGGCTGGTTCGTTCTCAACCACT  
TGGCACTAGGAAACCGCTACTGTCAGCTGTCCATAAGATGCTGCCAGAGGAGGATTTCACTGCTGCTGCTACGCTTCTGACAGTCTACTGTACTGCTGGTGGCT  
TCGTGACCGGCTCATCTTGTGCGCGGCAATCCATCTGATCCACTTGGCGCTGGTGGCTTTGGTCTGGCCCATCACTATGGCCAAGCACATGGGCGCTCAGTATT  
GCAACTGTTGGTCTCAATCAAGCGCAATATCTTGTCAAGGAGATGGCGTCCCAACGGAAACATCTTCAACTCTCGAATGCTTTCATGGAGGATATCATGGCT  
GCTACCGCGCGGAGTGTCAATGTCAATGTCAACTCTTGTGGAGACTGTGATGCTGCTTGGCTTGCATTGCTCTTTGGAGCATTCGTGGAGTTGGCAAGC  
GTGAGTGTGATGACGCTGGCAAGCTTGATATGCGCATCTTCTGAAGAACGCTACATCTACTGCTTTGACTTGTGCGGAGTTTTCACGCGCAAGATAACTACTACCAAG  
GTGTTGCTCAAACTACACGGCTGAAGTGAATGAGATGACCGCGCGGATCAACAGGCTCCGCTATTGCAACCTTTGATGTTGGCGGAGATGGCCAAAGCTTACCGAT  
ACTTTGGCAACAAGATCGGCTCGGCAAGTGTGATCTCAATGGAGAATCCCAAGAGTCTTGGCAGTCAAGGCAAGTCAAGGCAAGTCAAGGCAAGTCAAGGCAAGT  
CTTATTGCTGTTGGTGTCTCGGTTGCTCGGCCGAGTCTCAGTCTGGATGATGTTCTCGCGGTGCCCGCAAAATCTGCTTCTTGGAGCTTGGATGCGATAAGCC  
CAGGCGAGCTGAGCTTGTCAACCGTCTCCGAGATGCGCGTCCAGCGTCACTGTTGCTGCGGATGTTGTCACAGGAGTCAAGGTTCTGTAAGCTGTCGCGACTTCTGC  
CAAGGATGGCCCAATGGCGGTGTGCTCCAGCGGCTATGGGCTCAGTGAAGCTTTGTTCTCTGTCATGACGAACAAGGCTGGCACACTGGCATAAGGCAAGTGA  
AGGGCTCTTGAACCTTCAAAATGCGCTAGAGGGCCATGATGCGGCACTGATTTCTTCTCTGACTTCACTGATTTCTGGCAGCTGTTGGCAGCTACCGAGATAACT  
ACTGCTGCTGAACCGCTTCCGATTCGTTCTGCTAGATGCGCGGCTCTCAAGGCAAGCTGCGGCTTCTGTTGGCTTGGGCAATGATTTCGGAAGTGGTATCTCATGA  
AAACCTGAGATCGAGGCTATGCTTCCGCAAGGATTCAGCGCTCAACAGGATGAGTTCCTCAAGTCTTAGACTACGGTATTGGCGCCAGGCAAGTGTGCGG  
AATTTGCTCGCGGTGCTCCATGAACAGAGAAGCCGCTCATATCTTGAACGGTCTGAGGATCTTACGGTGTCCGCAAGCTGATGGCTCAGGCTTCAAGGTAACAACCG  
GTCATGATGAGTCCCGACGTCATTTCTGCTGCTCTGCTCTGAGAAAGGATGCAAGGAGGAAAGAAAGGTTGGCAGTGTGGACAGCTCTCGCCGCTGCGCA  
ATGGGTCAAGGAGCTTCCCAAAAGTGTCTCCCTATGTTGATGCCCCAGGCGACGCCACCCAGTATGTTGATGCTTACGCTTACGCTTACGAAAGGAGGCTTCAAGCAAC  
TGATCTGATGACAGTATGACAGTGTGACGAGCTGCCCCCTCCCATCTTGGTGTGACAGCATGCTTGTGCTGAGAGTTCGCAACTTGGTCTTCAACAGCTCAAGAT  
TGATGTACCTTCTCGATATTGTGACCCCAAAAAGTCTGACACAGCTGGCAGAATTTGTTGAGGAGAAGCTTGTGGCAGCTGGGCTAGCTAG



**mRNA sequence: *app1***

**Size: 7305 bp**

ATGTTCACTCTTGAGCCCTGCTTTGGACATCCCTCCGACTCAGAGTCGTTGCTTCGACGACATGCGAAGGACGCCATCGTTGCTACTGAAGCATCTATTTGAATGATGATT  
TGCAGGAAACTTCTGGGGCCCTTATGTCGCTGTACAATTTGAAGACAATACCGTGTGCAITTTGGCATGGCTTGCATCTCCCGGGGGAATCACCTCACCACCGGGGCTTT  
GGGACTATGTGTACAAACAAAACCGCCGCAAGGCACCTGTGCCCTGGATCAACATCGAGGGCTTCTACCAAAAGGATGGTAGCAGGGCTGGCTGATAGGCGT  
CAACGGCGGATCTCTTCAAGAAAGTTCGCAAAAGTTGATCCCTCGTTCTTTGGTATCAATAACCTTGAAGCGTCTACATGGATCTCAGCAGGAAAGCTGCTTGA  
AGTTGTCTCGAATGCTTTGAAAATGCTGGTCTATCTATGGAAGATGTGTGGCACTAACACGGCTGTGATGTCGGCAACTTCACTGTGCACTCTGTCAATGCGACT  
TCGGTATACAGACTACGTTACAGACTAGTGTCTACTGGTGGTGGCACTTCTATCATGTCCAACCGTATCAGCCATGTCTCAATTTGACGGCCFAGCTTTACCTTTGGAT  
ACTGCTGTCTTCCACCATTATGCACTTCCAGGCGTGAACGCCATCAAGAATGGTGTGACTGGCACTTGCATTTGGCGGAGCCAACTTGTACAGCTCCCGGAG  
CAGCACTTTGGAACAGCAAAAGGGTGGCTTCTCTTCCAAACCTCGGCTTGCATACATTCGACACGTCAGCAGATGGTTACGCTGTGTCAGAGGCTTAAACGCTATCTAC  
ATCAGCGGATTTGCTGTCCATGAAGAGTGAACCGCAAGATCCATGCACTTCTGGAACGCCATCAACGCCAATGGCAAACCTCTGGCATTACCTTGGCCGATGC  
CAAGATGCAGGCTGTGTAATCAGAAAAGCATACCAGAATGCCGGCTTCACTTGGCCGATACCGACTATGTTGAGTGGCCACGGCCTGGTACACCAAGTTGGTATCCGA  
TAGAGGTGGATGGTATCGCGGCTGTTTTCAGGTCGTGAGGGGAGAGCTCTGAGAATTTGATCAGTGAACCAAGCAATGGGTACAGTGAAGCCGCCAGCGGTTTTCAG  
ATCCATCATCAAAGTTGGCTCCCTTTTGGACACGGAGTAATCCCAACCTTATGGCGTGAAGAACGTAACCCCAAGCTGAAACTCAAGGACGAAATATGAAGGTAT  
TGCCAGCTCGAGCTGTGGCCAGAGCCCTTCCGCGGCTGGTGTAAATTCCTTGGTACGGCGGTGCCAAGCCAGCTTATCTCGAGTCTATCGATAGCTACTTCCG  
TTGGCTCTCTGCTTCACTCCCATCACGAGGACTTTGTCAAGCCCTTATGATTTGAGAAAGGATCAAGTCTTTGTGCTTCTTCTCAAGCAAGTCTGGTGA  
GGTTCGCGGTAAGCAAGCTATTTCCGACATGGAGAAGACTGAGGCCAAGTCTCTCAAGGCCCTTGTGCTGTATGAGCAAGCGACAGCCAAAGTACGCTCCGCGACT  
ACGTACTCGGCTCAGAGAATGCTGCTCAACAAAATGATTGAGATGCTGTGAACACAAGTAAACAGCAAGTAAACAGCAAGTAAACCGTATCGAGTGGTTCGCGAAACATCCCCGCA  
TGCTAGATGGCTTGGCTGGTGACCAAGCTTGGCGAGTCAAGTGGTGTGGCCAGGAGCGGCATACATGGCGATTGCTATCGAAGCTCTCTCAGAGTCTCAGAAC  
ATAAAGGCTAAGCTCGTTCGGGAGAGCGCTTCTCTTTCGAGTTTGAAGATATCAATATAAGCGCAGCATTTGTCGTCCCTGACGAGAGCGGAGCTGACGAGCAC  
TGAGTTCACACGGTTCATGCTCTCGCAAGATCTACCGCAATACATTTGGCAATTTGGCATGAATTTCCATCTCTTGGGTGTGGTGTGCTACTTTGCACTG  
TTTCTACCCGTGCTGTGCTTTTACTTTCGATTGCCGATGGCACACCTGCCATTGACATGCCGACCTACCGCATGAAACCGGTATACCTGGTAAAGCTCCCGTGCAGCCTG  
AGACAAGCATCTATCTCAACGCCAGCCATGCTTCTGTTCCAATGGAAGCCAGATGTTTGGCGCTCCAGCCAGGCGTGAAGCGCTATTCAGGAGTATATTTCTCTCT  
TTGCTGTGAACAGTCTGACGATTGGAATGACAACGGGGCCCTTATTGATTTTGGCAGCTTCTCGATCTCTCGGCCACAAGGTTCCGCTATGAGCGTTTGGAACTCGG  
GCAAGAGCGTCAATGGACCCGGAAGGATGCAATCCATCTTGGGCAAGGACACTGCTATCCCTCGTTCCGAGTTTGAACAGTGGCAAGCTTGGTGGAGACAATAAGA  
TTGCCATTGAGAAATGCCAAGGAATCAATCCCTACGATGCTGTTCTGATTCTCATCTGTTGTTTGAAGAACTTGGAGCAAGGCAGCAGGAGATTGCCCTTAG  
TTCCGACGACGGGATCAATATCACTCGGAAAGCAAGGATGCCATCTCCGCTGTAAGGCTACTGGCTTTGACTCTATCTCTCCCAAGCAGACTCTCATCGCAGTGA  
AGAGCCCAAGAAAGACTGGTTTGAAGGCAAGGAAGTAGTATTGTAAGCCAACTCTTCTCTCTCCATCGATTCTTGGCTGCTGCTGTGACTGCTCACTGAAAGA  
GGCTGTGTTGCTCAGTCAAGTCCGCTATCGCCAAATATTGAGTCTGTCAATCTCAACGACCAAGTGTGTCATCTCTTCAAGAGTGAACCGCAATTTCTGTC  
CACCATAGCGGCGAAGCATGGATCCGCTTCCGTAAGATCACAGCAATGTCGGTGTCTTTTGGCTCAGCGGAGCAAACTGCTTTTGCACCAACCTGATCTCA  
CTTGTCTAGCGGCTCTCTCGAGCTCTCATGCTAGAGCAGCCGGCATGGAGTATGCTGTTTGGACATTTGAAGTGTATTAACCAAGCCCACTACACTGCAACTATCT  
GCAACAACGCTCGGAGCTTTGACTTCCGTTACGAAACAGACGATAACGAATTTACCAAGAAAGATGGAATCTTTACGTCAGCGCTTTCCGCTCGATGTTGAGTGA  
ACTCTTGTCCGACAGCGTATGACTCCGGATACTATGAAGTGTGCTCTTGAAGAGGTTGGCCAGCCAAAGCTGTCTATTGTCAGGTTGGAATGACCGACTATTC  
ACTTTCAGCAAGTCTCGAGCGCAAGACACCGCTCCAGCTGGTTTGTGGATGTTGATCTCCGAGCTGTGGGCTCAATGCCAAAGACATCTACCGCCTCAATGGTCTGTG  
CCGAGACTGATCGGCTACTACTGCTTGTACTTGGTGGTGTATCTCGCGGCTTGGACCTGATGTCACGACCTTAAGGTAGGAGACCGCGGGCTGGTGTTCGTTCTTA  
ACCAGTCTGGCACTACGGAACCGGCTACTGTGCAAGCTGCCAATGAATGCTGCCAGAGGAGGATTTCACTGTCTGCCTACGCTTCTGACAGTCTACTGTACTGTCTGG  
TTGCCCTTGTGACCGGCTCATCTTCTGTCGGGCAATCCATCTGATCACTTGGCGTGGTCCCTTGGTCTTGGCCCATCACTATGGCCAAAGACATGGGCGCTAC  
AGTATTGCAACTGTTGGTTCTCAATCTAAGCGCGATTATCTGTCAAGGAGATGGGCGTCCCAACGGAAAACATCTTCAAACCTCGCAATGCTCTTTTCAAGGAGATAT  
CATGGCTGTACCAGCGCGCGAGGTTGCAATGTCATTGCAACTCTCTTGTGGAGACTGATGTCATGCCTTGGTCTTGCATTTGTCCTTTTGGACGATTCGTGAGAT  
GGCAAGCGTGAAGTGTGATGACGCTGGCAAGCTTGAATGCGCATCTCTGAAAGAACGCTACATCTCACTGCCTTGTACTGTGCGGAGTTTTTCTACCGCAAGATAACTAC  
TACCAGGTTGGTGTACAACACTACCGGCTGAAGTATTGAGATGACCGCGCGGATATCAAGGCTTCGCTATTGCAACCTTTGATGTTGGGAGATTGGCCAAAGCT  
TACCGATACTTTGGCAACAAAGATCGCGTCCGCAAAAGTTGTCATCTCAATGGAAGATCCCAAGAGTCTTGTCCAGGCTATGCCAGCATCTTACCAATCCGTTTCCATCT  
GAGAAGACTATTTCGCTGTTGTTGCTCGGTTGTTCTCGGTTGTTCTCGGCGCAGTCTCAGTGTGATGATGTCGCGGTGCCGCAAAATTCGTTCTTGGAGCTTCTGGATGCG  
ATAAGCCAGCGCAGTGTGAGTGTCAACCGTCTCCGAGATGCCGTTGCCAGGCTCACTGTTGTTGTTGCGGATGTCCTCAACGAGGATCAGGTTGTTGAAAGTGTGCGCA  
GCTTCTGCAAGGATGGCCCAATGGCGGTGTCGTCAGGCGGCTATGGGCTCAGTGAAGCTTTGTTCTGTCTGATGACGAACAAGGCTGGCACACTGGCATAACAGCC  
CAAGTGAAGGGCTCTTGAACCTTCAATGCCCTAGAGGGCCATGATGCCAGCTTGAATTTCTCTCTGACTTCACTGATTTTGGCAGCTGTGGCACCGCTACCGA  
GAGTAACTACTGCTGCTCAACGGCTTCTCGATTGCTTCCGATGATGGCGCCCTCAAGGCAAGCTGCCGTTTCTGTTGGCTTGGCATGATTTGGAAGTTGGTAT  
CTCATCAAAACCTGAGATCGAGGCCATGCTGCTCCGCAAGGATATTACGCGCTCAACAGGATGAGTCTTCAAGTTCTAGACTACGGTATGGCGGCCAGGCGAG  
TGATGGCAATTTGCTCGGCTGTTCTCAATGAACAGAGAAGCGCTCATCTTTGACGGGCTGGAGTCTTACGGTGTCCGCAAGCTGATGGCTTCCGAGCTTCCAGGTTGA  
ACAACGGTGTATGATGAGTCCGCAAGTCAATTTCTGCTGCTCTGCTCTGAGAAGGATGCCAAGGAGGAGAGAAGGTCGGATGTTGGAACAGCTCTCCGCC  
GCTCGAATGGGTCAAGGACTTCCCAAGTGTCTCCCTATGTTGATGCCAGGCCAGCCACCAAGTCTGAGTGGATGCCATCTTACGCTTCAAGAAAGCGGTT  
CAGCAACCTGATCTGATGACGCTAGATGACGTTGACGAGCGTCCCTCTCCATCTTTGGTGTGACAGCATGCTGTGTCAGAGTCCGAAGTGGTCTTCAACAC  
GTTCAAGATTGATGATCTTCTCGATATTGTCAGCCCAAAAAGTCTCTGACACCGCTGGCAGAAITTTGTTGAGGAGAAGCTTGTTCGACGCTGGGCTAGC

#### 4. References

- (1) Chiang, Y. M.; Ahuja, M.; Oakley, C. E.; Entwistle, R.; Asokan, A.; Zutz, C.; Wang, C. C.; Oakley, B. R. *Angew. Chem. Int. Edit.* **2016**, *55*, 1662-1665.
- (2) Yin, W. B.; Chooi, Y. H.; Smith, A. R.; Cacho, R. A.; Hu, Y.; White, T. C.; Tang, Y. *ACS Synth. Biol.* **2013**, *2*, 629-634.
- (3) Yu, D.; Xu, F.; Zi, J.; Wang, S.; Gage, D.; Zeng, J.; Zhan, J. *Metab. Eng.* **2013**, *18*, 60-68.
- (4) Aleksenko, A.; Clutterbuck, A. J. *Fungal Genet. Biol.* **1997**, *21*, 373-387.
